# Supplementary material for: Prospective development and validation of a liquid immune profile-based signature (LIPS) to predict response of patients with recurrent/metastatic cancer to immune checkpoint inhibitors
Source: PubMed Central journal article supplement — J Immunother Cancer. 2021 Feb 16;9(2):e001845. doi: 10.1136/jitc-2020-001845 (PMC7888377; doi:10.1136/jitc-2020-001845), 2021-02-16
Supplement: jitc-2020-001845supp001.pdf [file jitc-2020-001845supp001.pdf]

**Table 1. Baseline characteristics of ICI treated metastatic cancer patients for which immunophenotyping was performed pre-ICI and after first ICI.**

| Features                             | Pre-ICI     | After first ICI | P-value |
|--------------------------------------|-------------|-----------------|---------|
| <b>Total</b>                         | 89          | 65              |         |
| <b>Gender</b>                        |             |                 | 0.1495  |
| Male                                 | 65 (73.03%) | 50 (76.92%)     |         |
| Female                               | 24(26.97%)  | 15(23.08%)      |         |
| <b>Age</b>                           |             |                 | 0.1167  |
| >=60                                 | 29(32.58%)  | 21(32.31%)      |         |
| <60                                  | 60(67.42%)  | 44(67.69%)      |         |
| <b>Tumor entity</b>                  |             |                 | 0.6233  |
| HNSCC                                | 40(44.94%)  | 29(44.62%)      |         |
| NSCLC                                | 39(43.82%)  | 31(47.69%)      |         |
| others                               | 10(11.24%)  | 5(7.69%)        |         |
| <b>Brain metastases</b>              |             |                 | 0.05829 |
| Yes                                  | 17(19.1%)   | 14(21.54%)      |         |
| No                                   | 72(80.9%)   | 51(78.46%)      |         |
| <b>PD-L1 TPS</b>                     |             |                 | 0.9467  |
| <1%                                  | 31(34.83%)  | 23(35.38%)      |         |
| 1-49%                                | 28(31.46%)  | 20(30.77%)      |         |
| 50%-100%                             | 28(31.46%)  | 21(32.31%)      |         |
| NA                                   | 2(2.25%)    | 1(1.54%)        |         |
| <b>Number of previous treatments</b> |             |                 | 0.1317  |
| 0-1                                  | 32 (35.96%) | 23(35.38%)      |         |
| ≥2                                   | 57(64.04%)  | 42(64.62%)      |         |
