# Supplementary material for: Prospective development and validation of a liquid immune profile-based signature (LIPS) to predict response of patients with recurrent/metastatic cancer to immune checkpoint inhibitors
Source: PubMed Central journal article supplement — J Immunother Cancer. 2021 Feb 16;9(2):e001845. doi: 10.1136/jitc-2020-001845 (PMC7888377; doi:10.1136/jitc-2020-001845), 2021-02-16

**A. Previous treatments 0-1 OS**

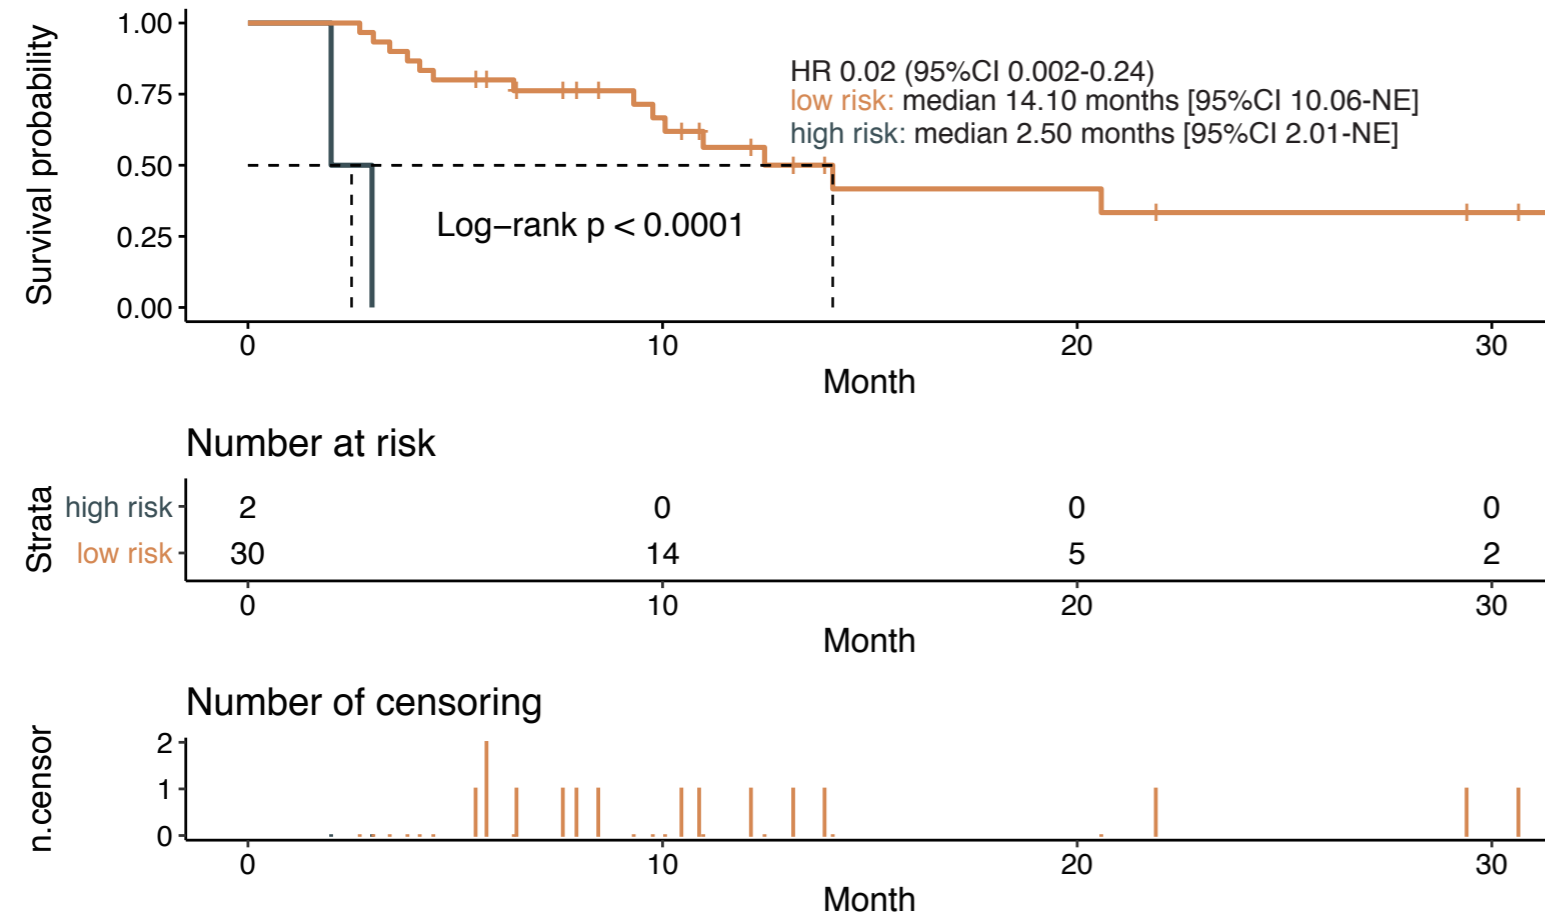

**C. Previous treatments 0-1 PFS**

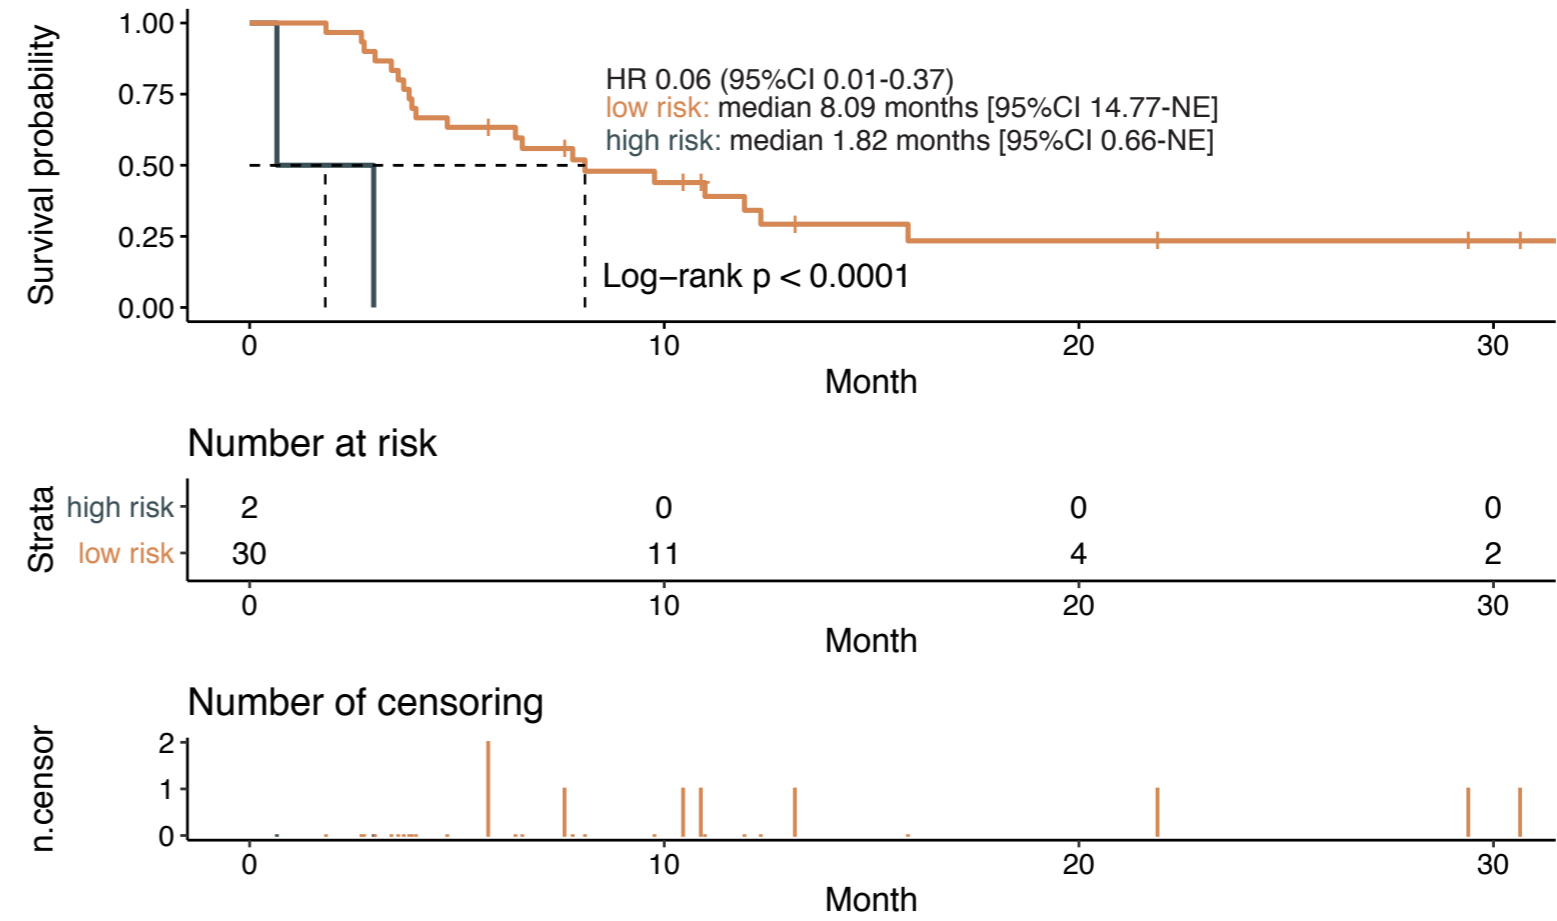

**B. Previous treatments ≥ 2 OS**

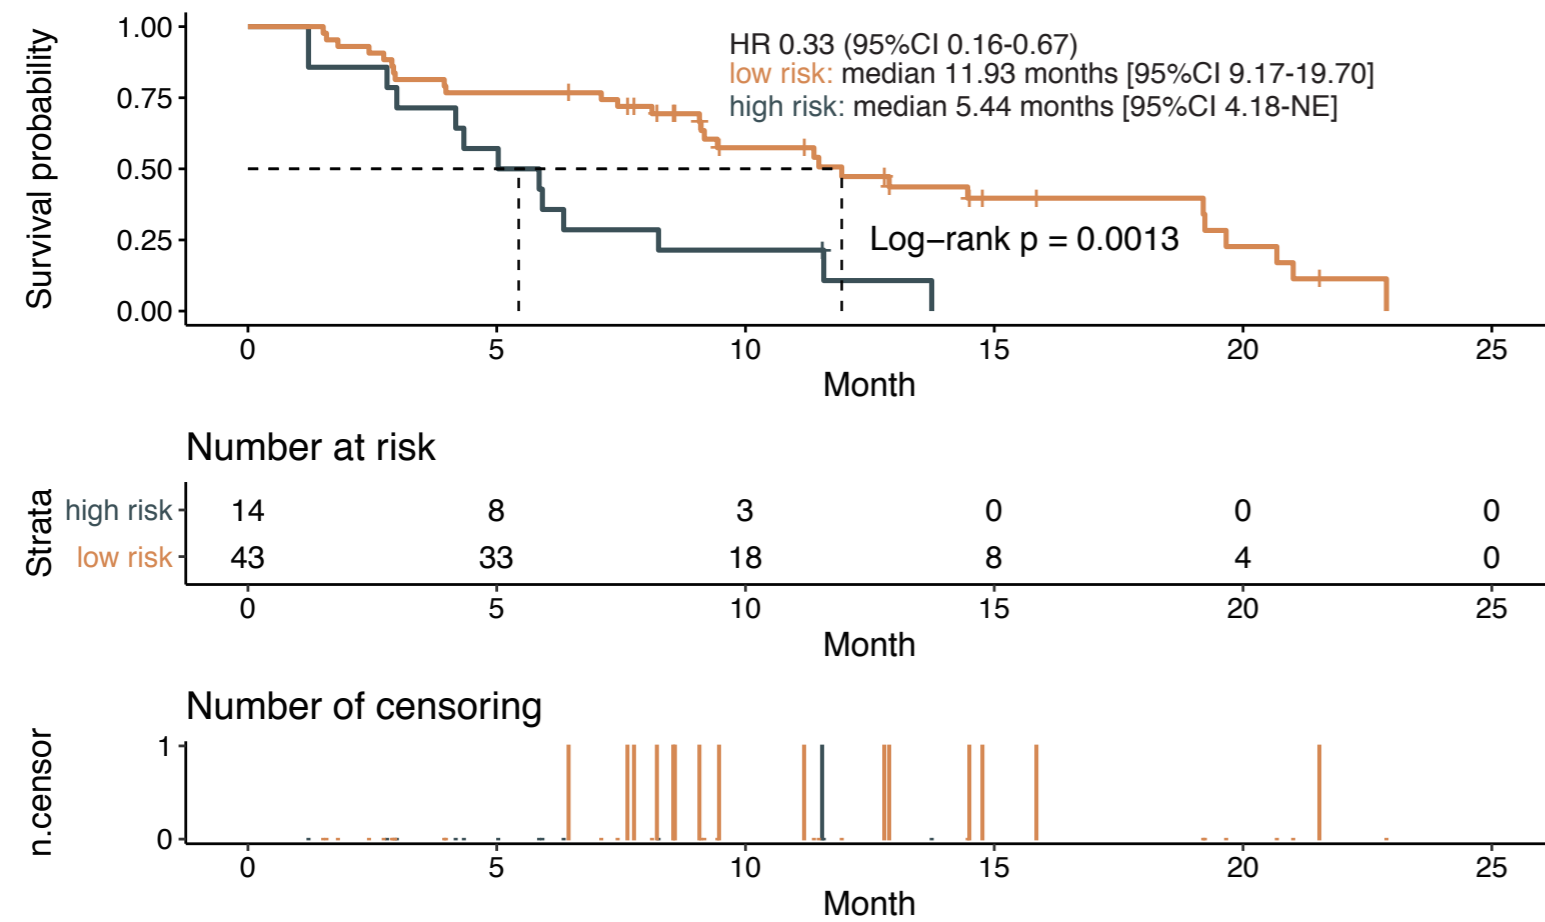

**D. Previous treatments ≥ 2 PFS**

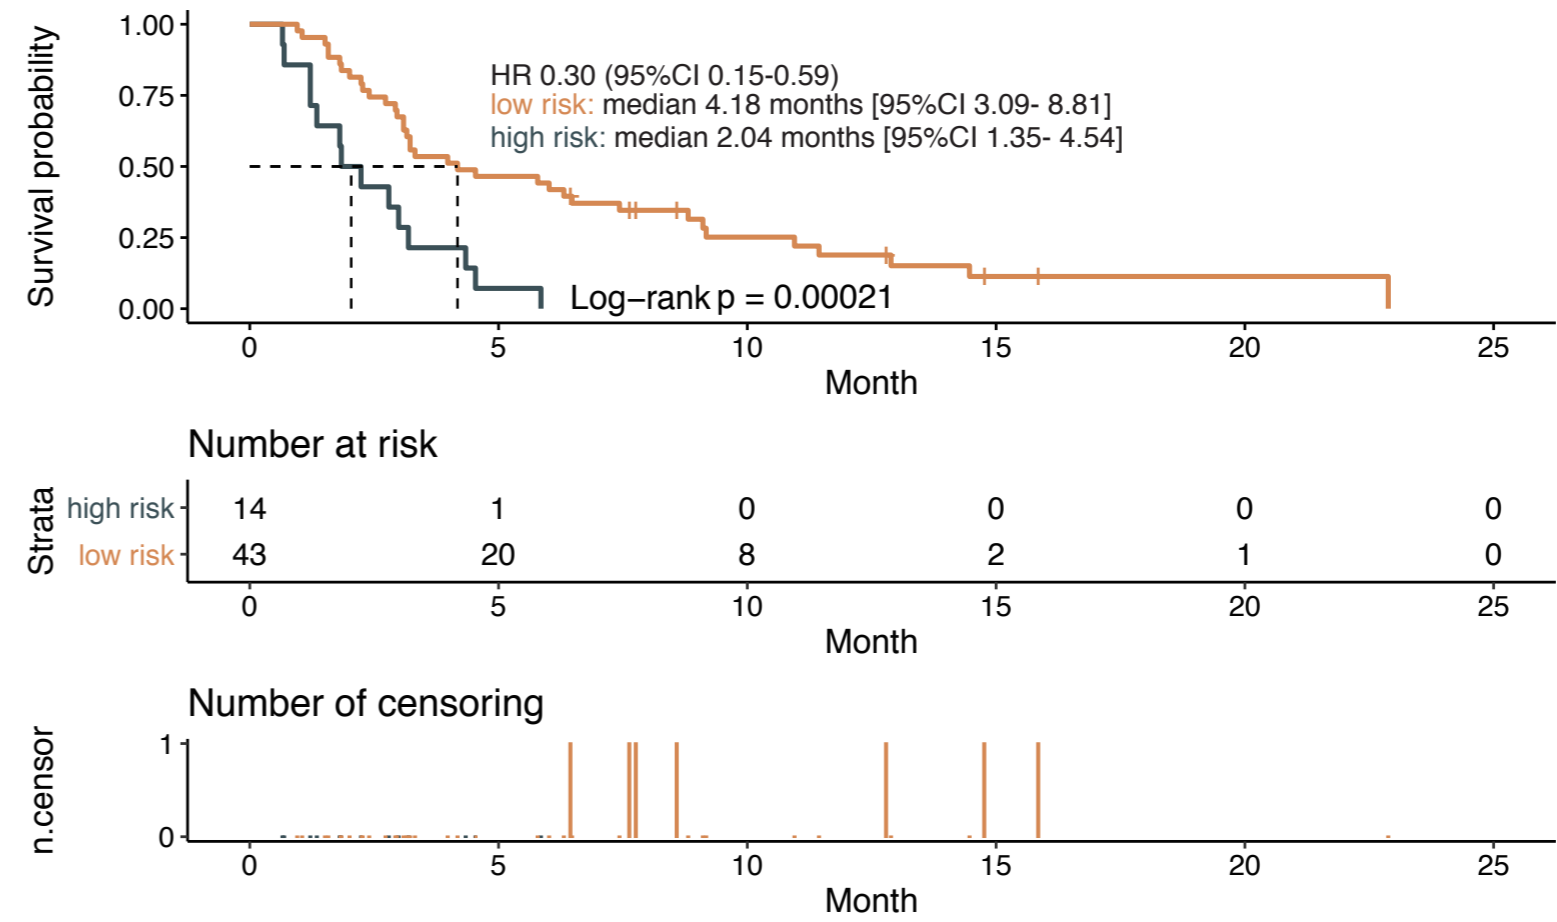

Supplement: jitc-2020-001845supp008.pdf [file jitc-2020-001845supp008.pdf]
