# Supplementary material for: Prospective development and validation of a liquid immune profile-based signature (LIPS) to predict response of patients with recurrent/metastatic cancer to immune checkpoint inhibitors
Source: PubMed Central journal article supplement — J Immunother Cancer. 2021 Feb 16;9(2):e001845. doi: 10.1136/jitc-2020-001845 (PMC7888377; doi:10.1136/jitc-2020-001845), 2021-02-16
Supplement: jitc-2020-001845supp009.pdf [file jitc-2020-001845supp009.pdf]

**sTable 2. Univariate Cox regression before second ICI.**

| Characteristics                                                        | HR   | 95% CI      | P Value |
|------------------------------------------------------------------------|------|-------------|---------|
| Monocytes (CD14 <sup>high</sup> )                                      | 1.21 | 0.49 - 3.03 | 0.67945 |
| Monocytes (CD14 <sup>low</sup> )                                       | 1.7  | 1.26 - 2.3  | 0.00046 |
| Neutrophils                                                            | 1.68 | 1.02 - 2.78 | 0.04192 |
| DCs                                                                    | 0.79 | 0.56 - 1.11 | 0.16808 |
| mDCs-1                                                                 | 0.45 | 0.15 - 1.32 | 0.14538 |
| mDCs-2                                                                 | 0.57 | 0.38 - 0.85 | 0.00606 |
| pDCs                                                                   | 0.62 | 0.37 - 1.04 | 0.06997 |
| NK cells (CD56 <sup>high</sup> /CD16 <sup>+</sup> )                    | 1.02 | 0.8 - 1.31  | 0.8612  |
| NKT cells<br>(CD3 <sup>+</sup> /CD56 <sup>+</sup> /CD16 <sup>+</sup> ) | 0.35 | 0.16 - 0.75 | 0.00735 |
| NKT cells (CD3 <sup>+</sup> /CD16 <sup>+</sup> )                       | 0.12 | 0.02 - 0.66 | 0.01513 |
| CD8 <sup>+</sup> T cells (PD-1 <sup>+</sup> )                          | 1.31 | 0.83 - 2.08 | 0.24879 |
| CD8 <sup>+</sup> T cells (CD25 <sup>+</sup> )                          | 0.91 | 0.62 - 1.33 | 0.62385 |
| CD8 <sup>+</sup> T cells (CD69 <sup>+</sup> )                          | 0.62 | 0.37 - 1.05 | 0.07321 |
| T <sub>regs</sub>                                                      | 0.8  | 0.6 - 1.07  | 0.13725 |
