# Supplementary figures and images for: Prospective development and validation of a liquid immune profile-based signature (LIPS) to predict response of patients with recurrent/metastatic cancer to immune checkpoint inhibitors
Source: PubMed Central journal article supplement — J Immunother Cancer. 2021 Feb 16;9(2):e001845. doi: 10.1136/jitc-2020-001845 (PMC7888377; doi:10.1136/jitc-2020-001845), 2021-02-16

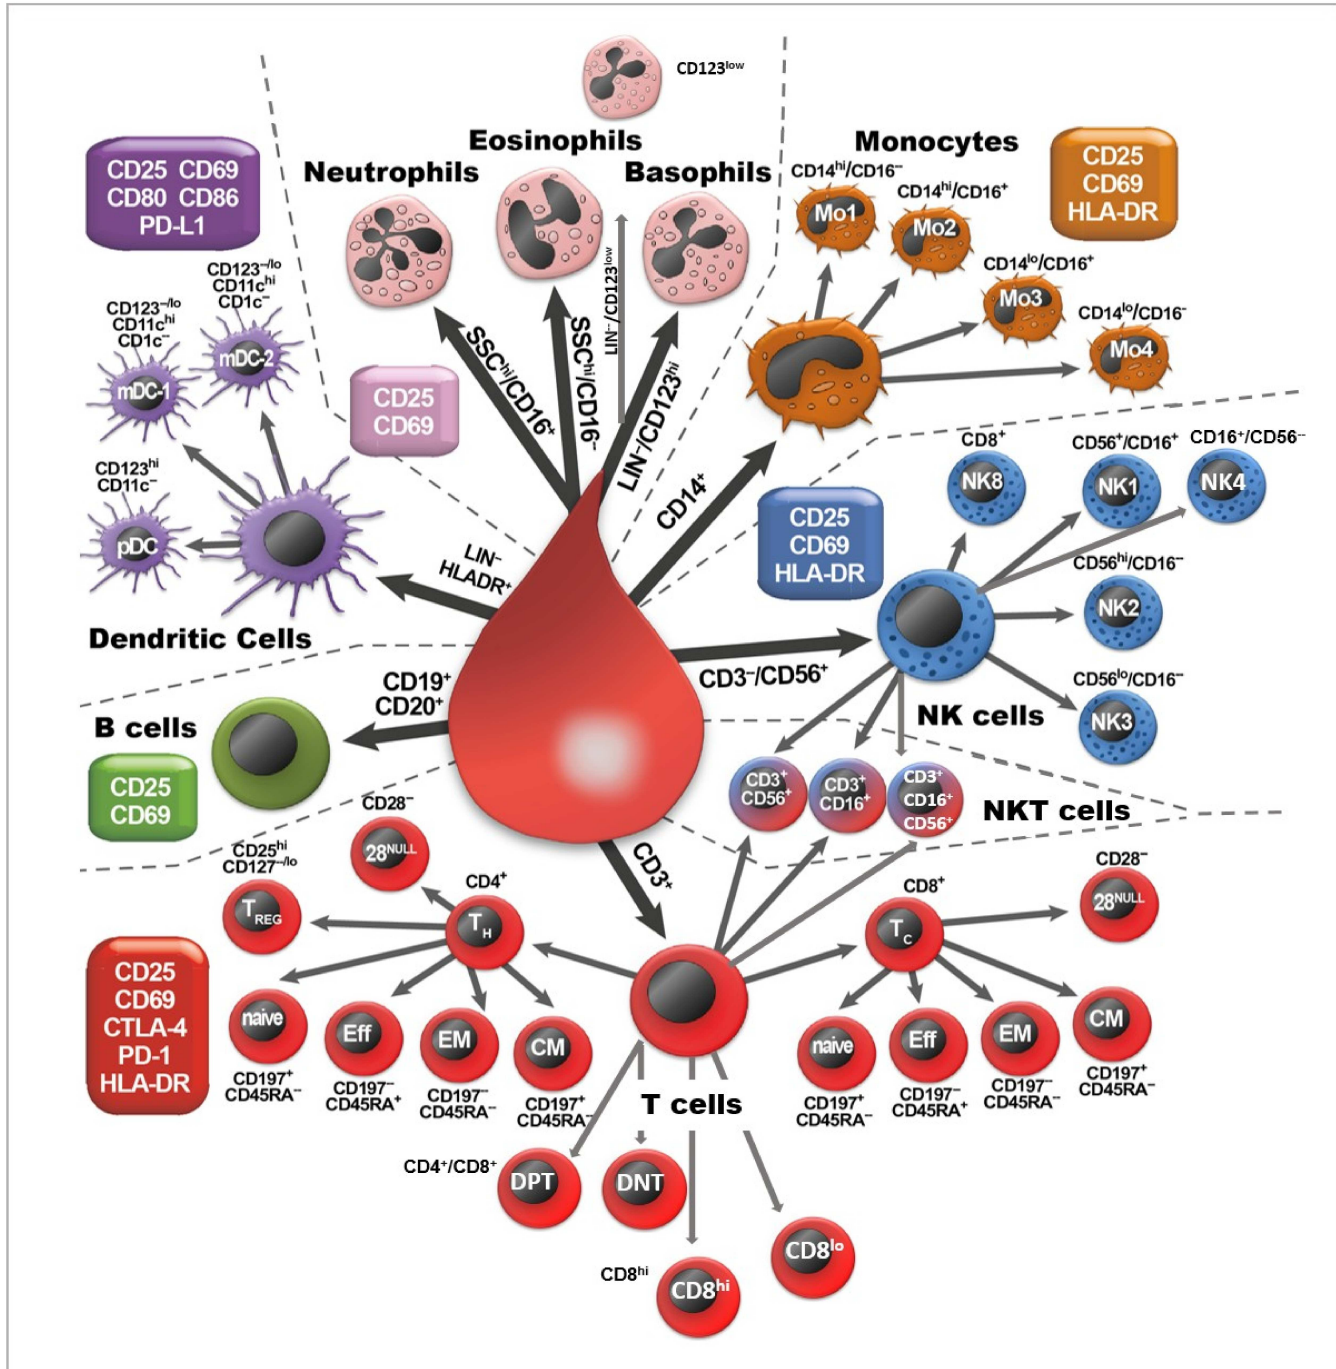

Supplement: jitc-2020-001845supp002.pdf [file jitc-2020-001845supp002.pdf]

**A. HNSCC OS**

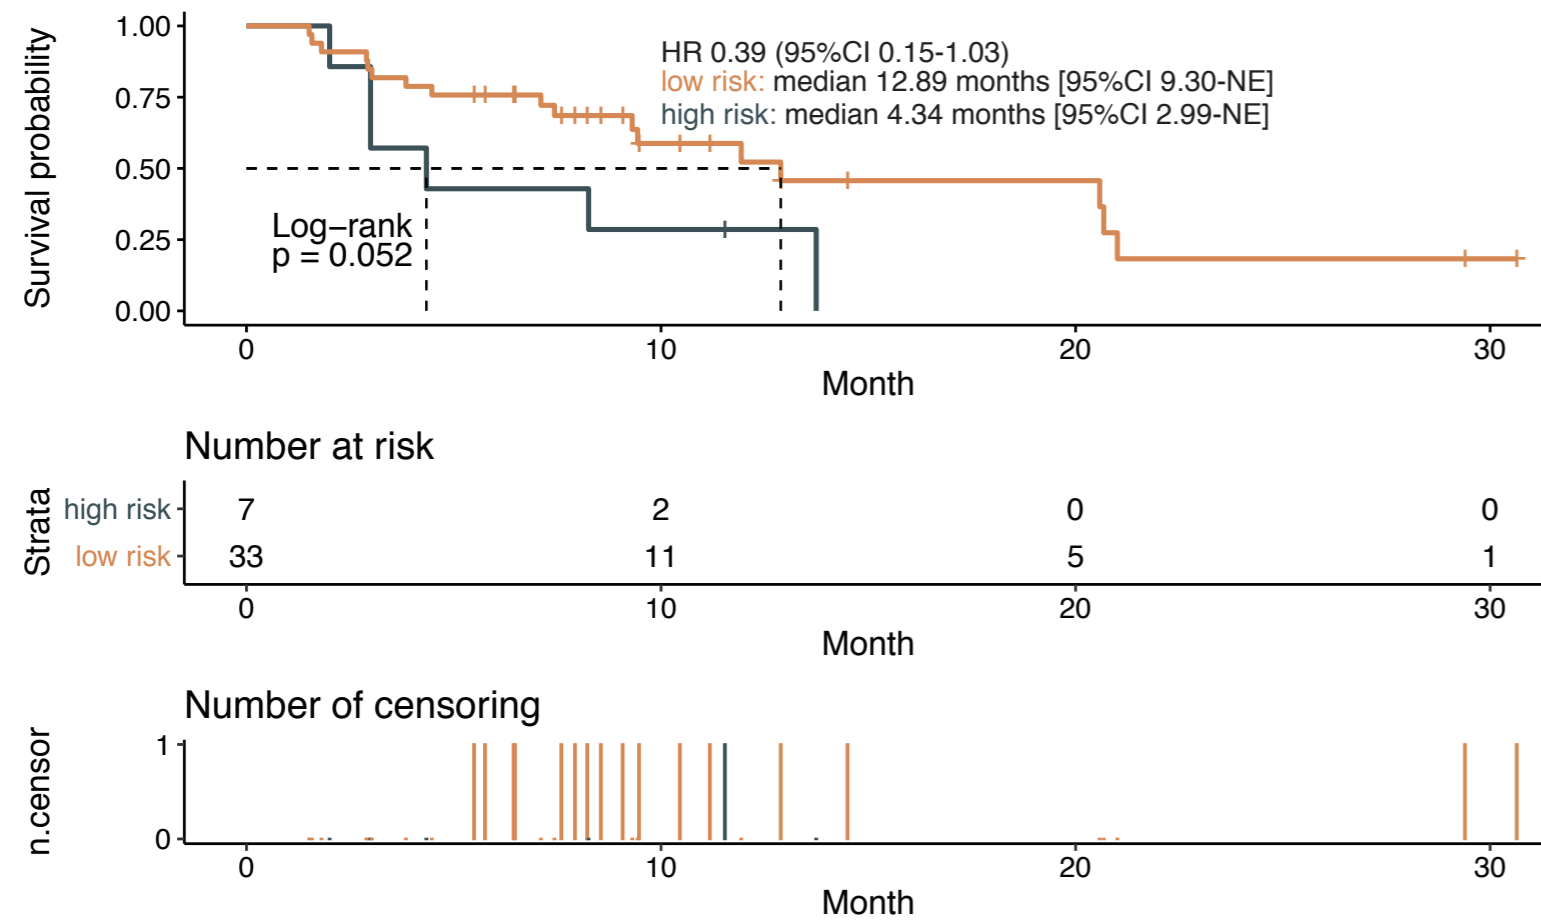

**C. HNSCC PFS**

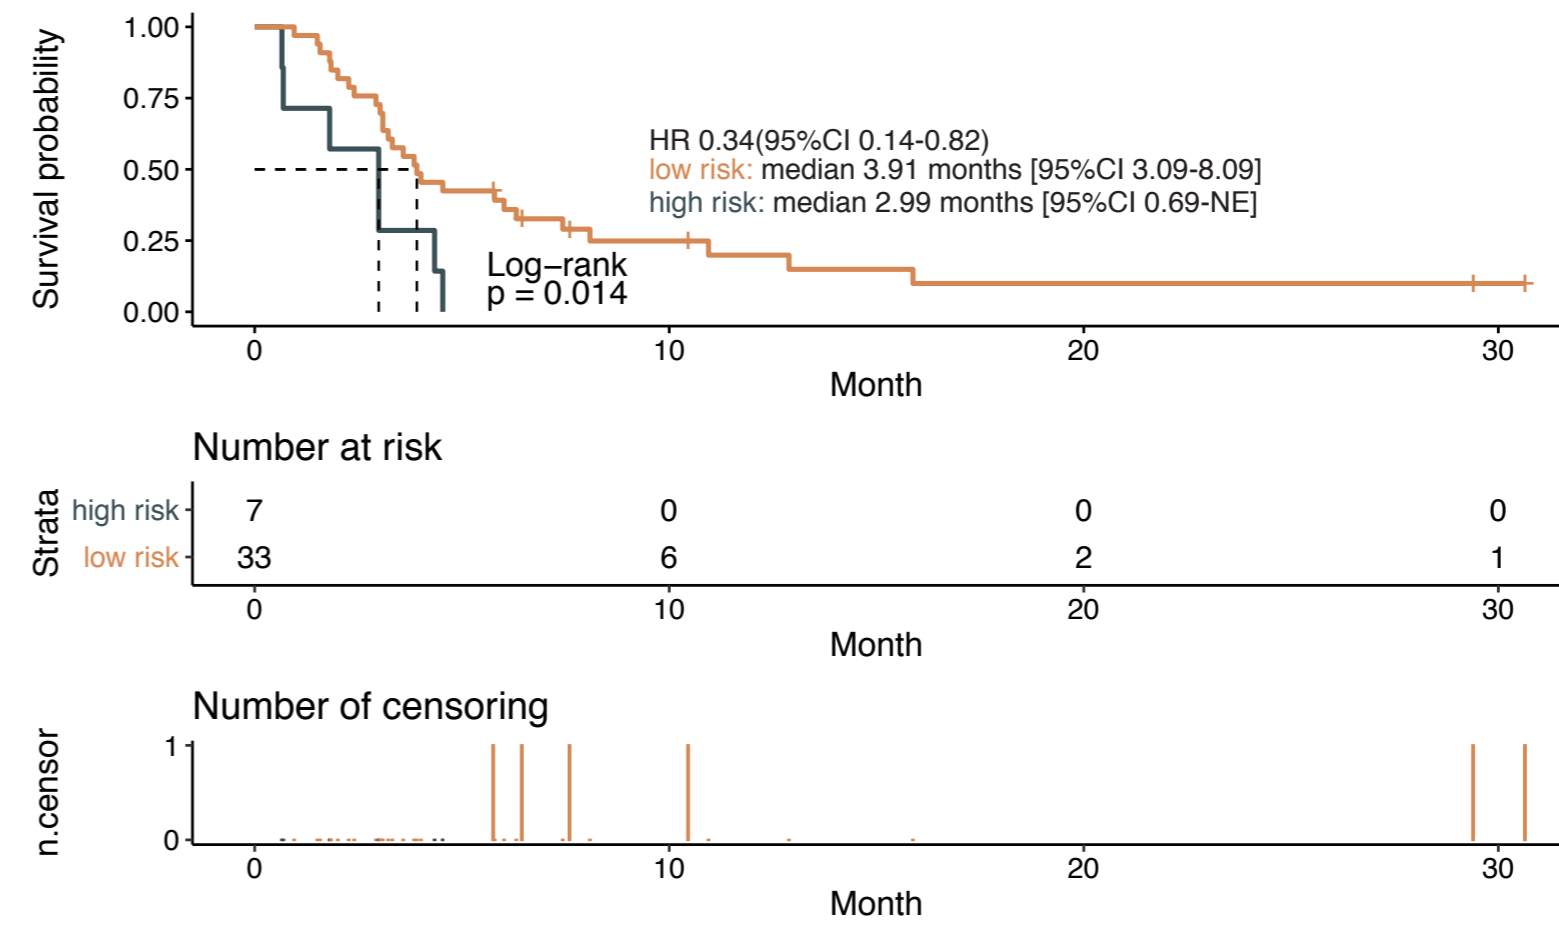

**B. NSCLC OS**

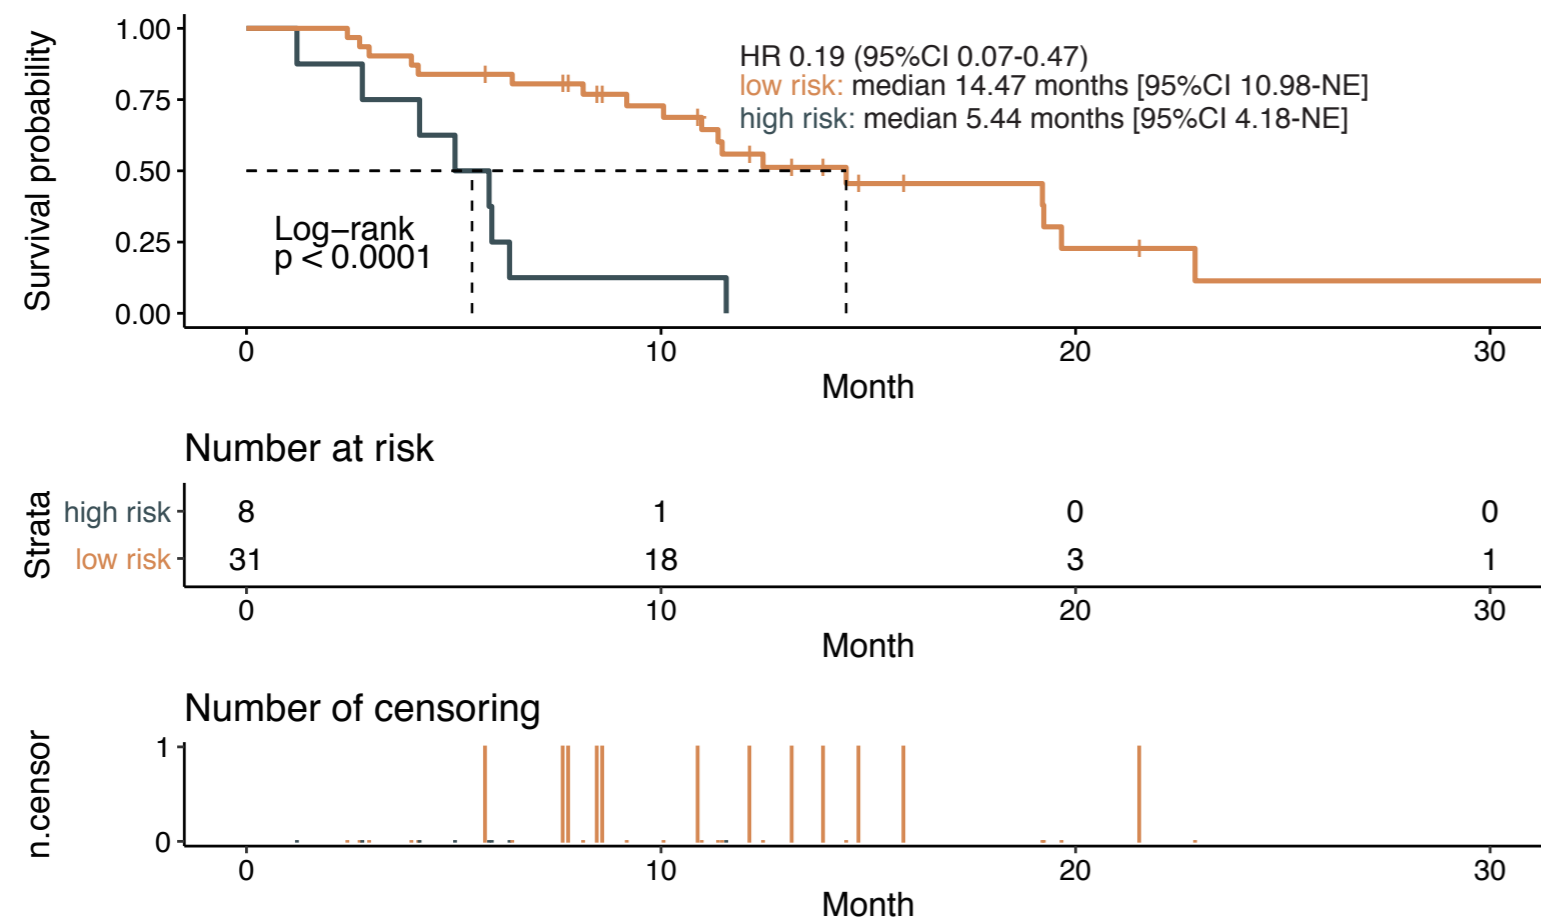

**D. NSCLC PFS**

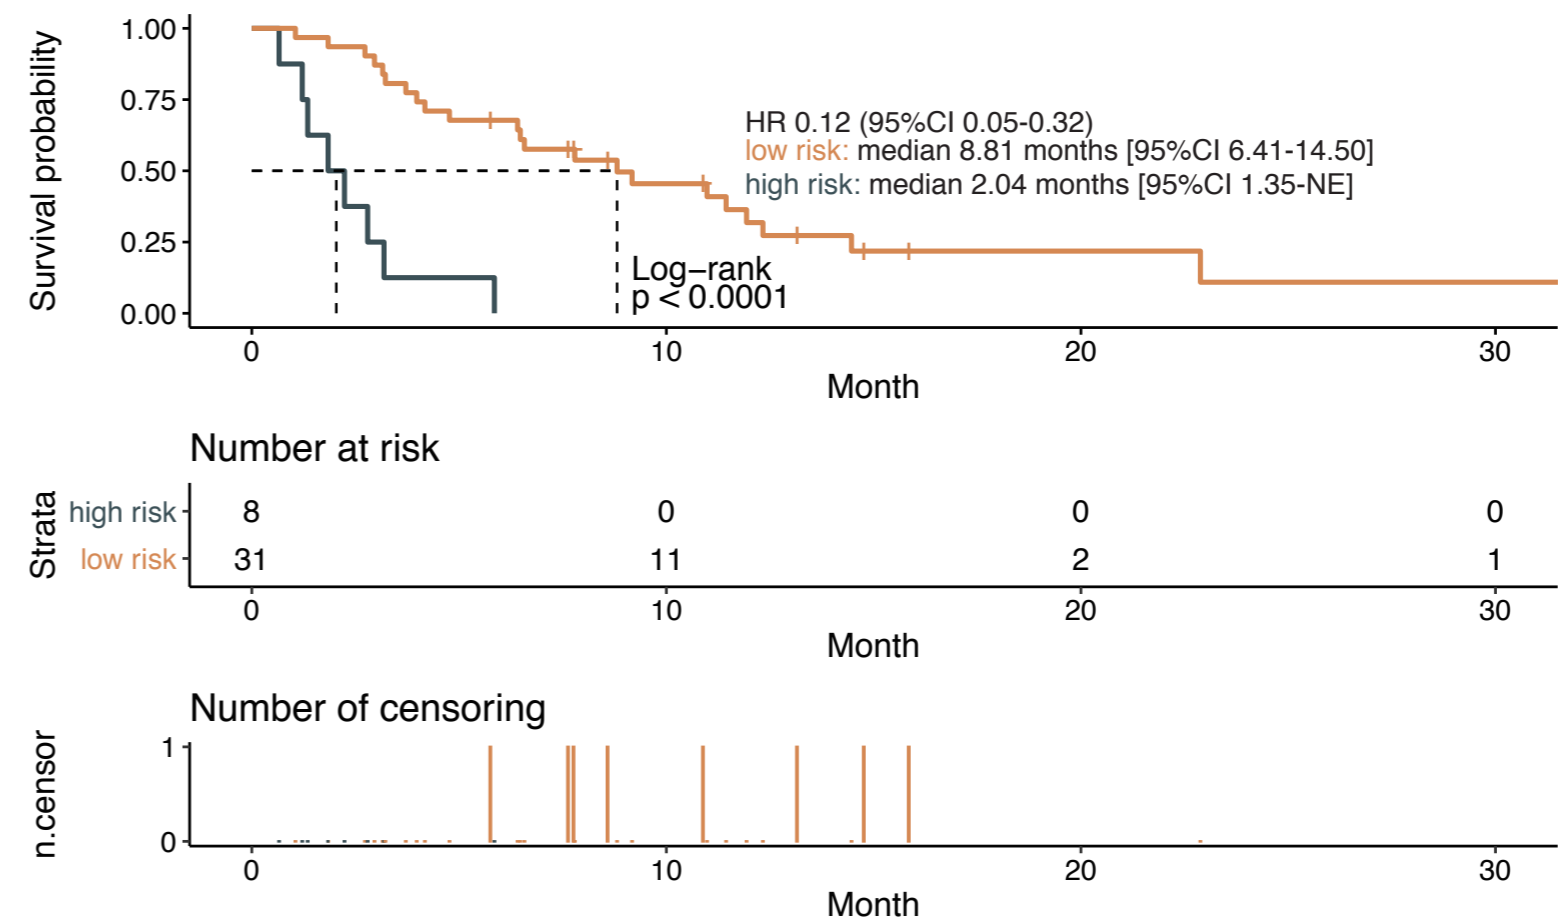

Supplement: jitc-2020-001845supp003.pdf [file jitc-2020-001845supp003.pdf]

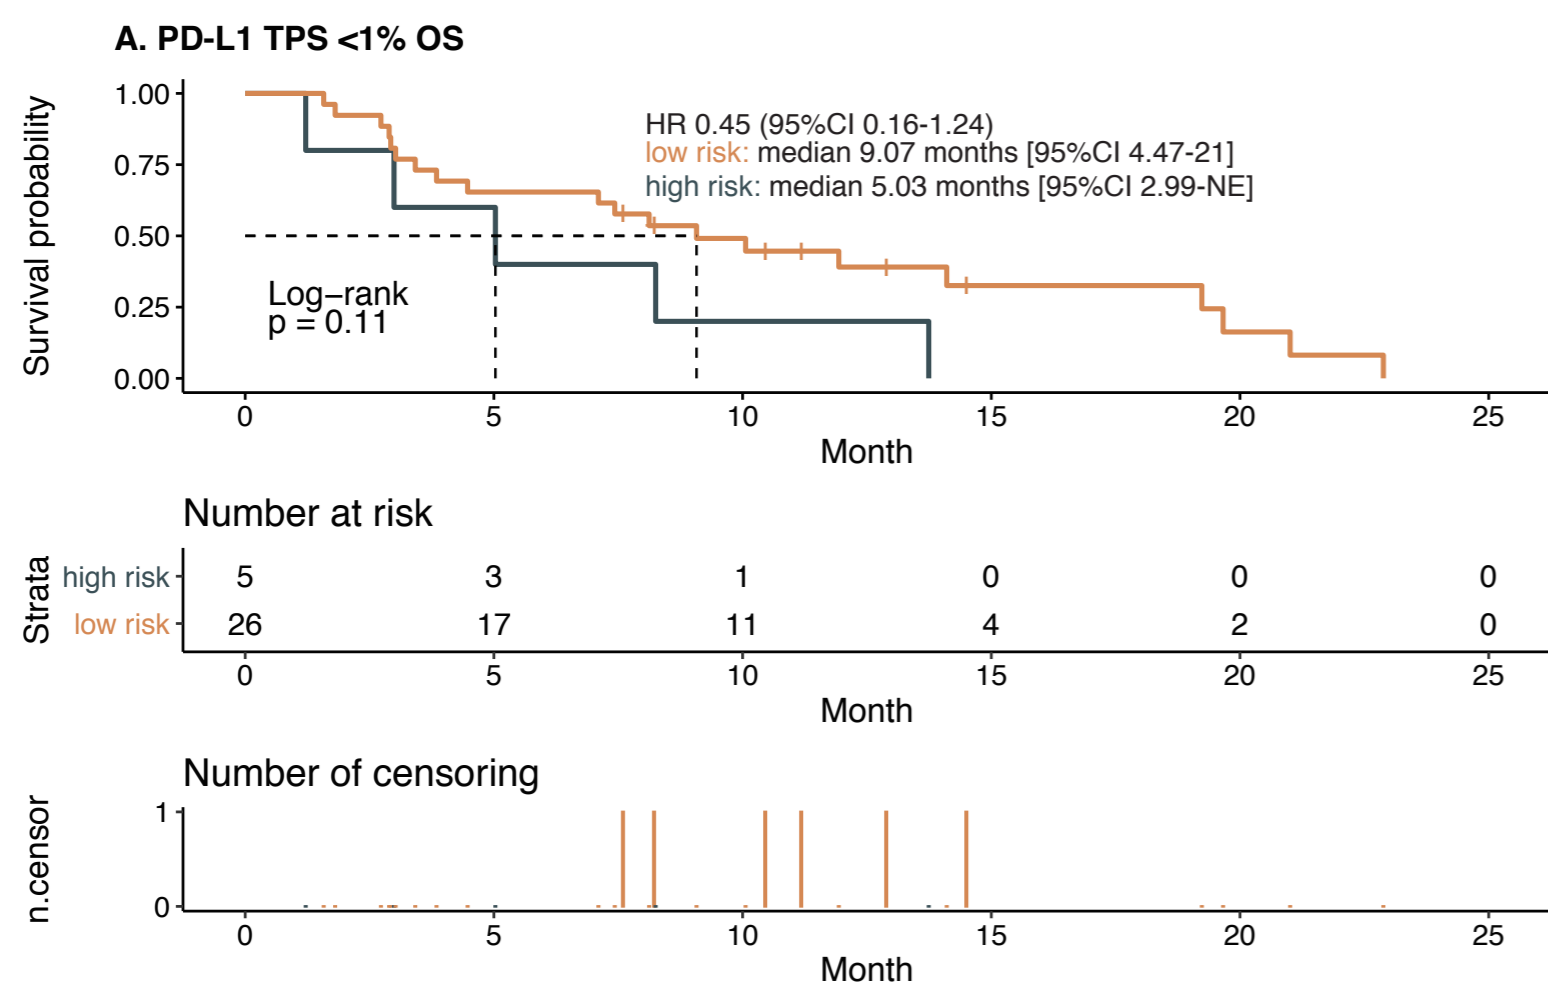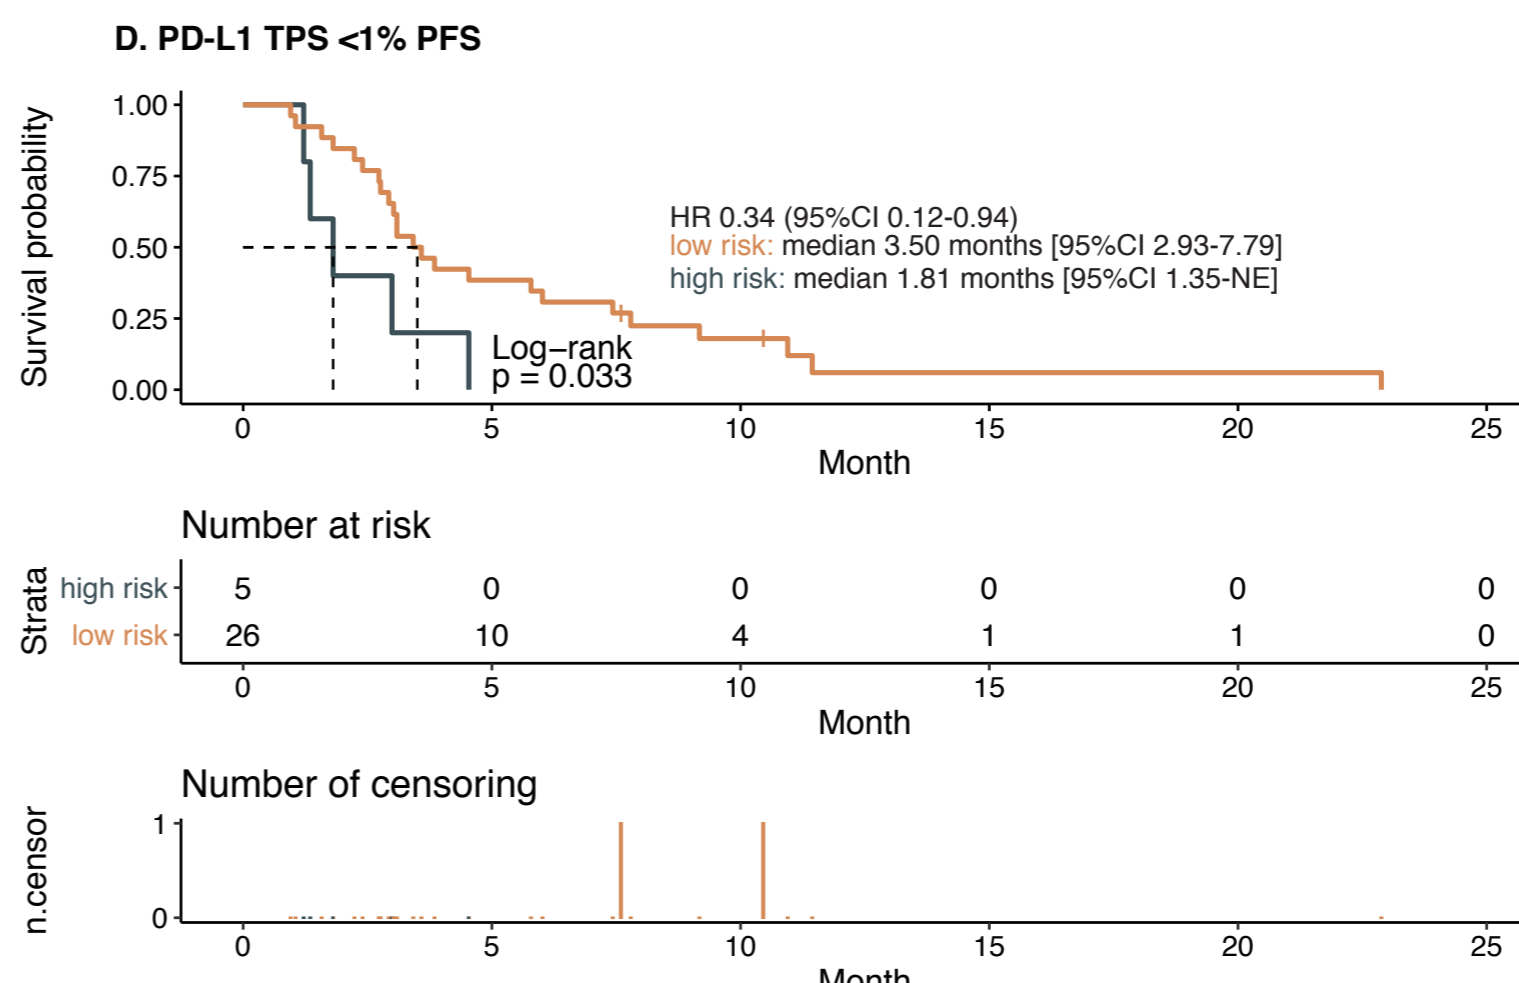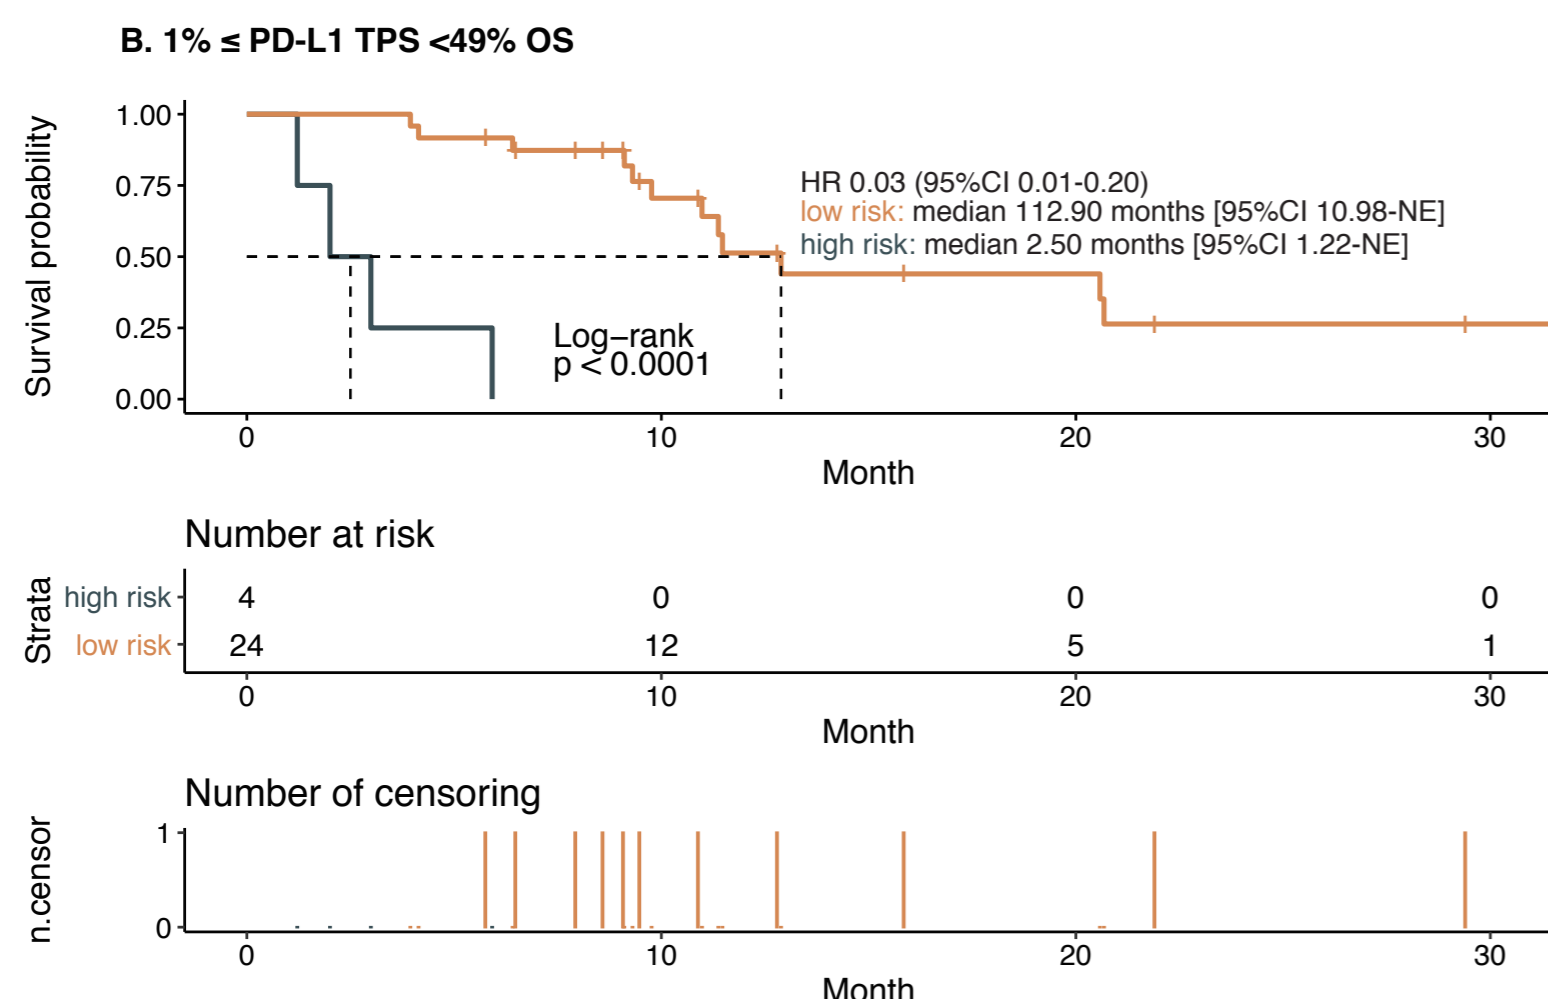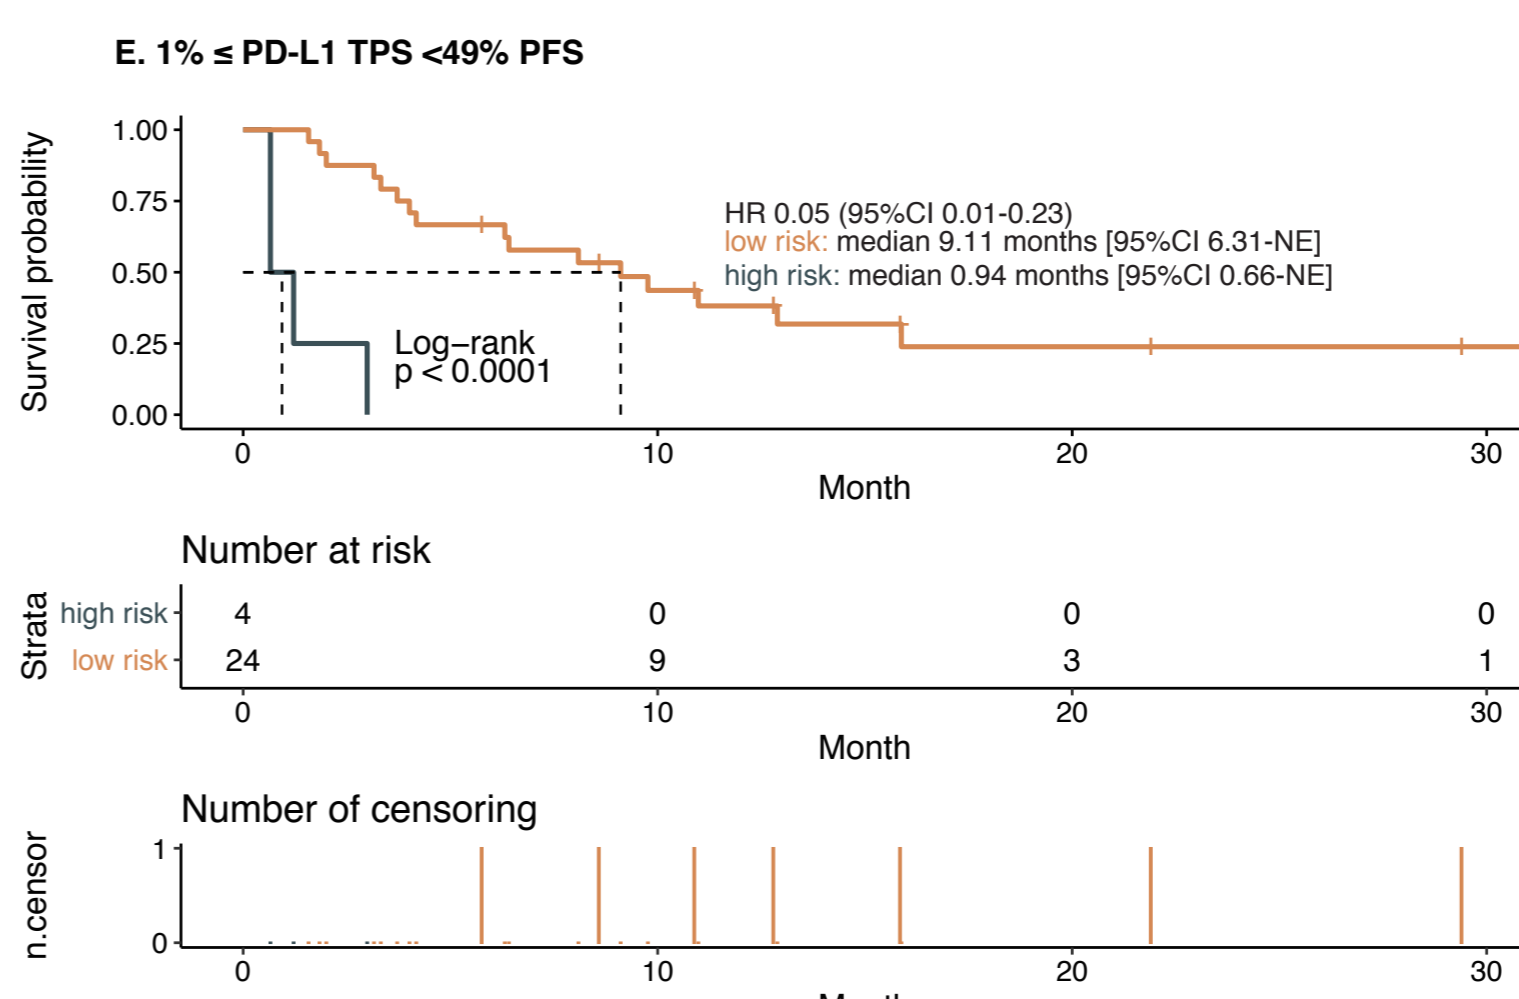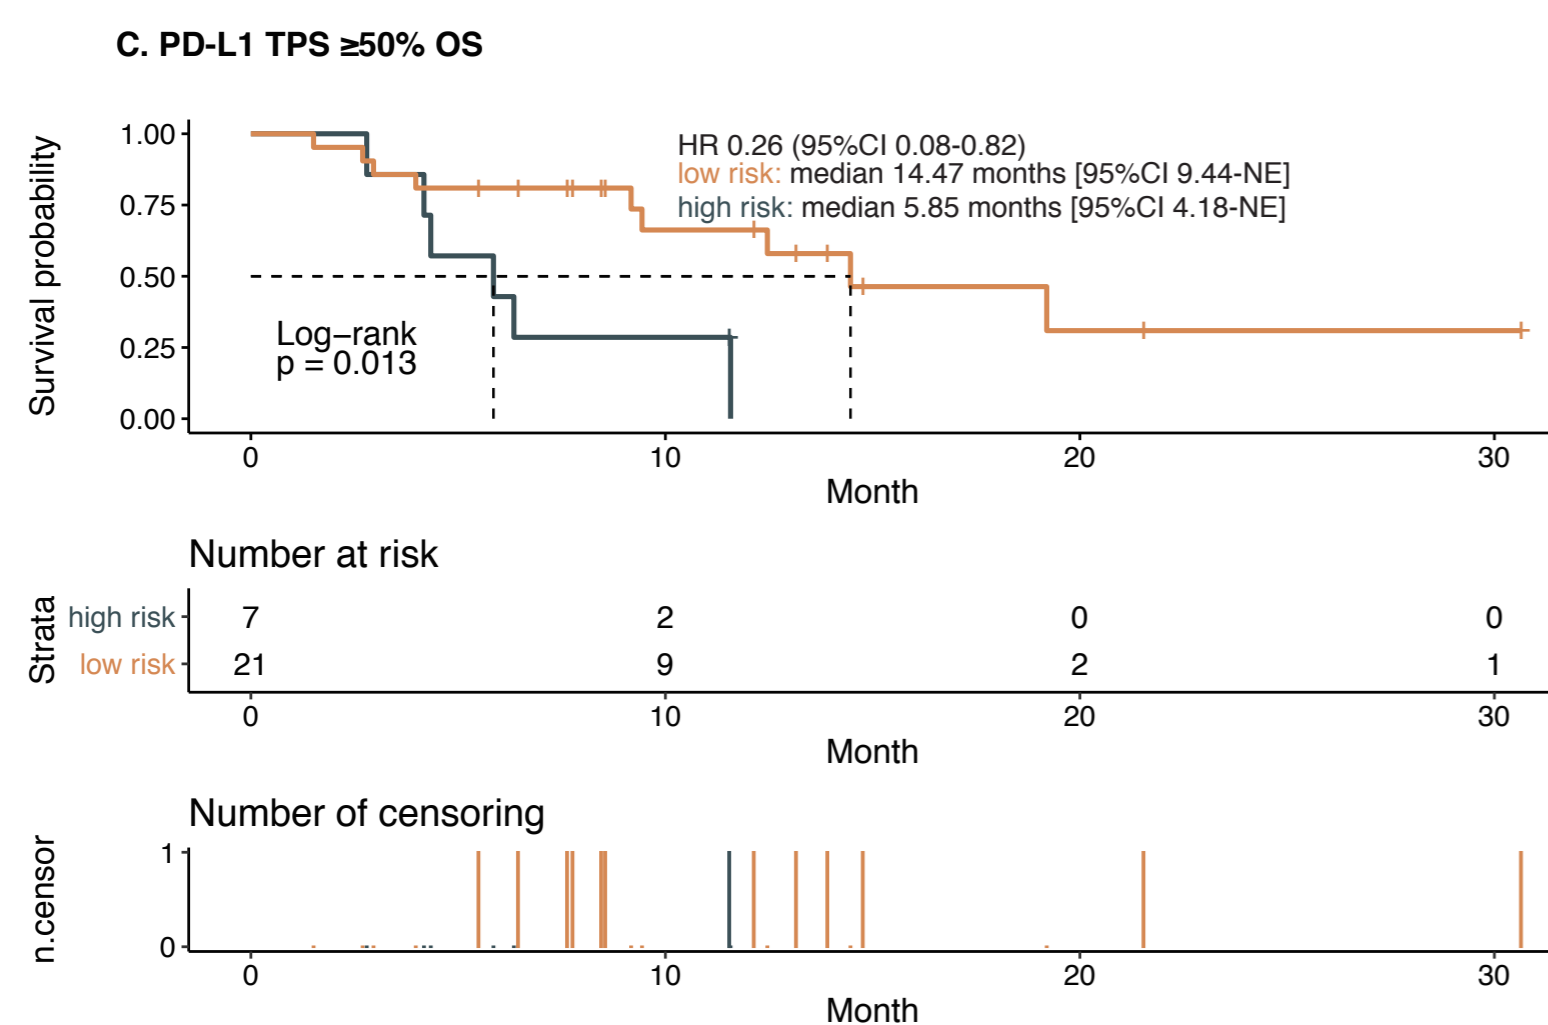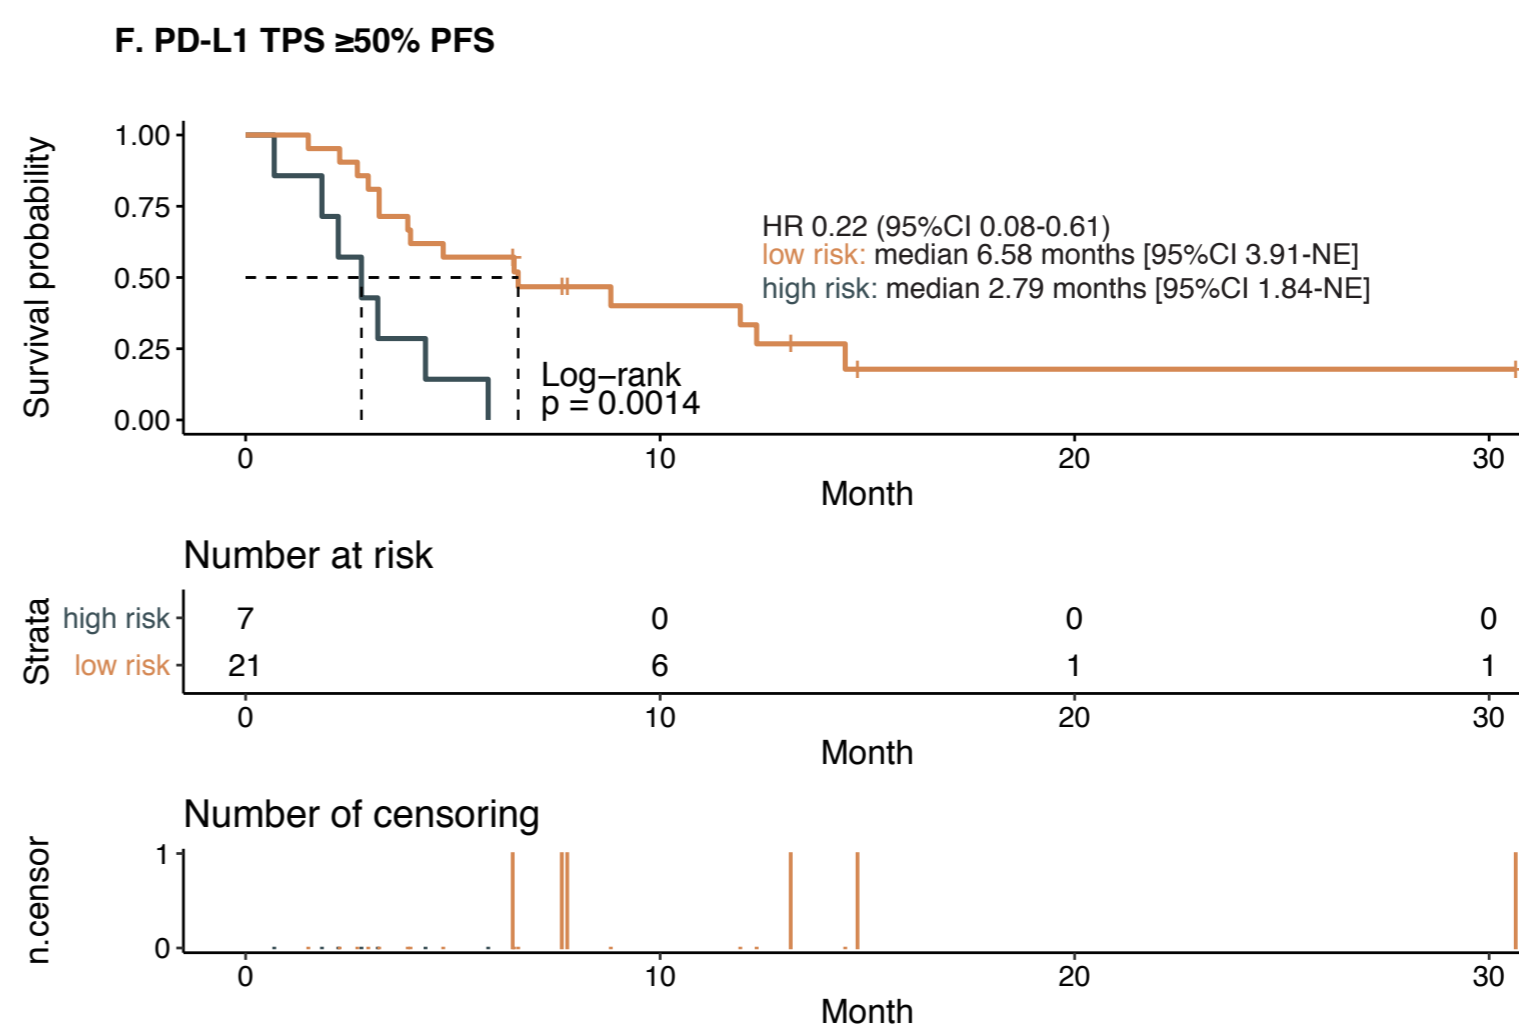

Supplement: jitc-2020-001845supp004.pdf [file jitc-2020-001845supp004.pdf]

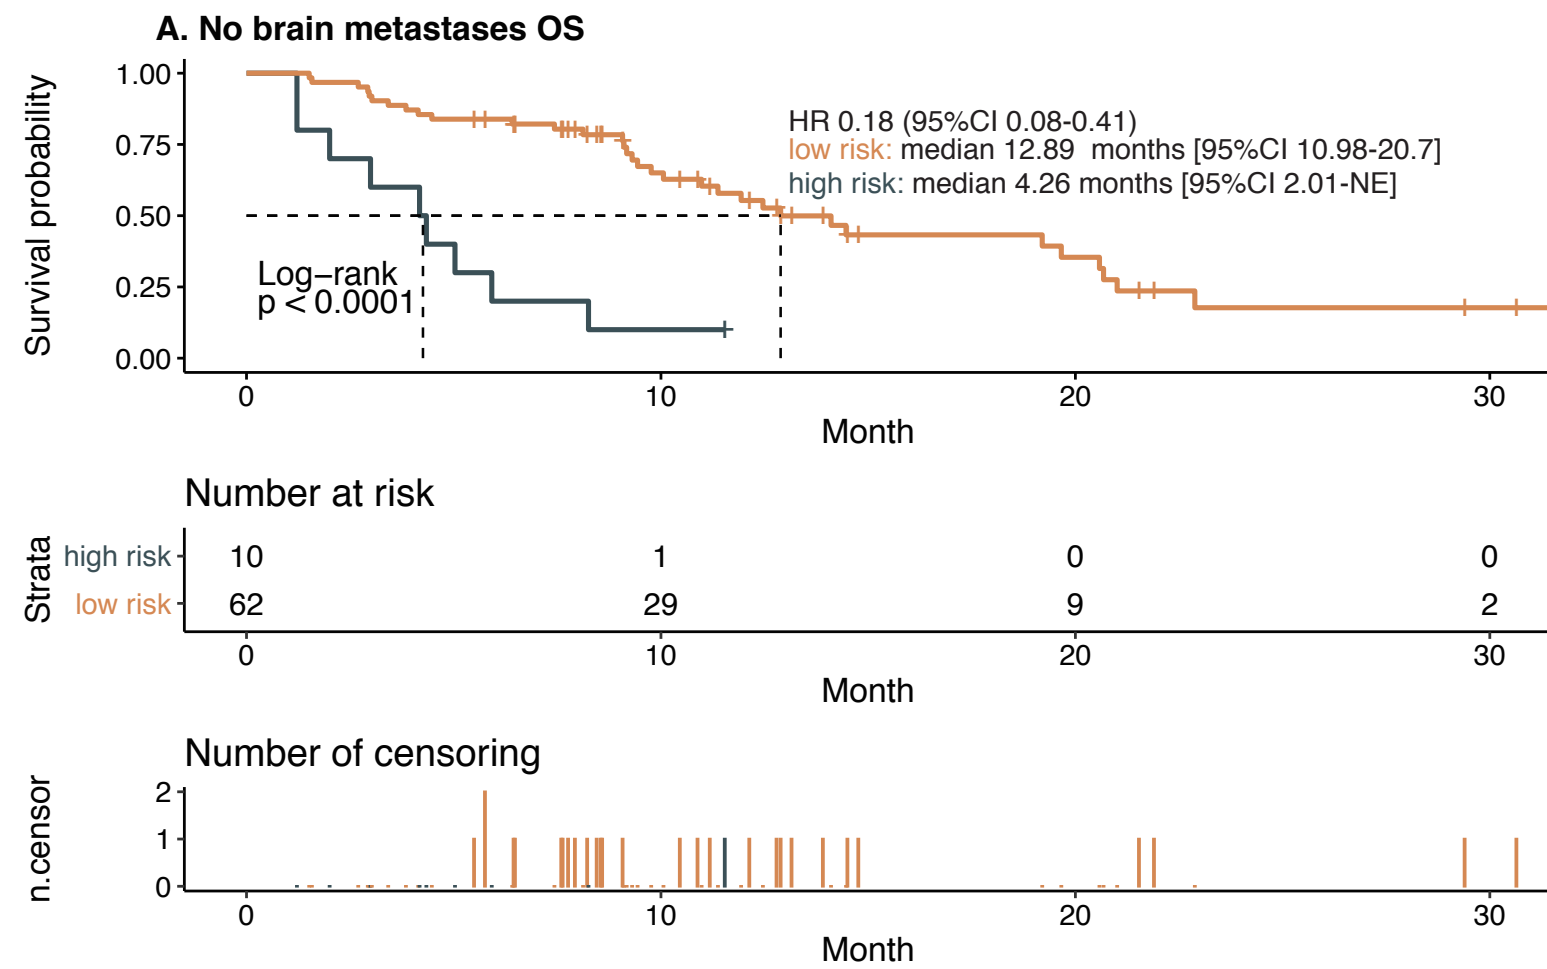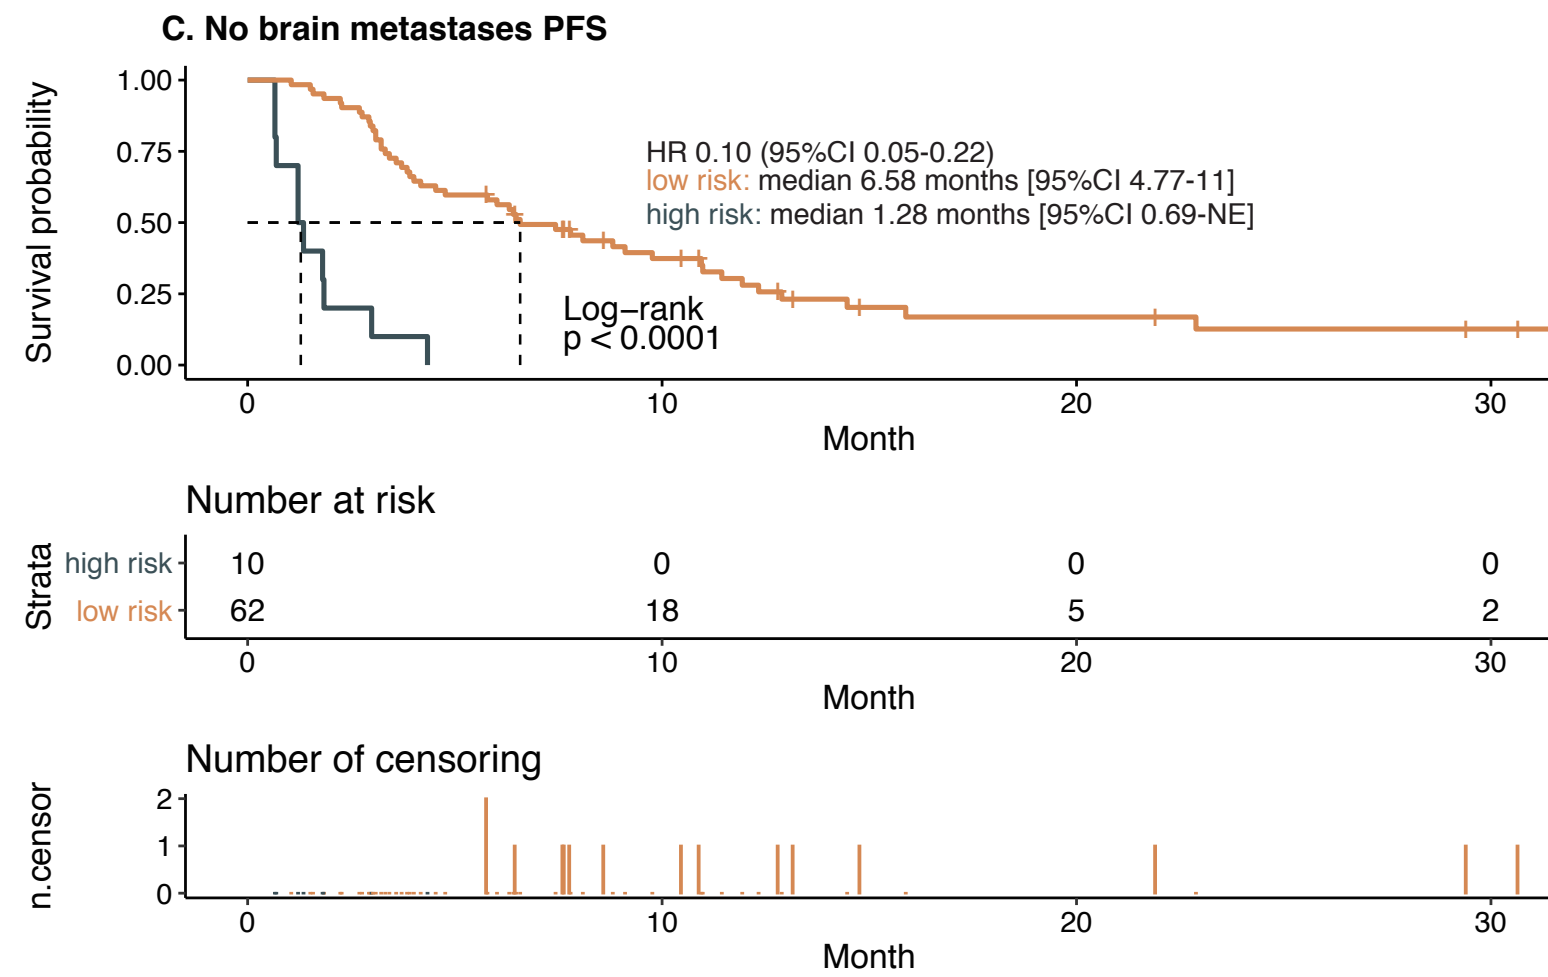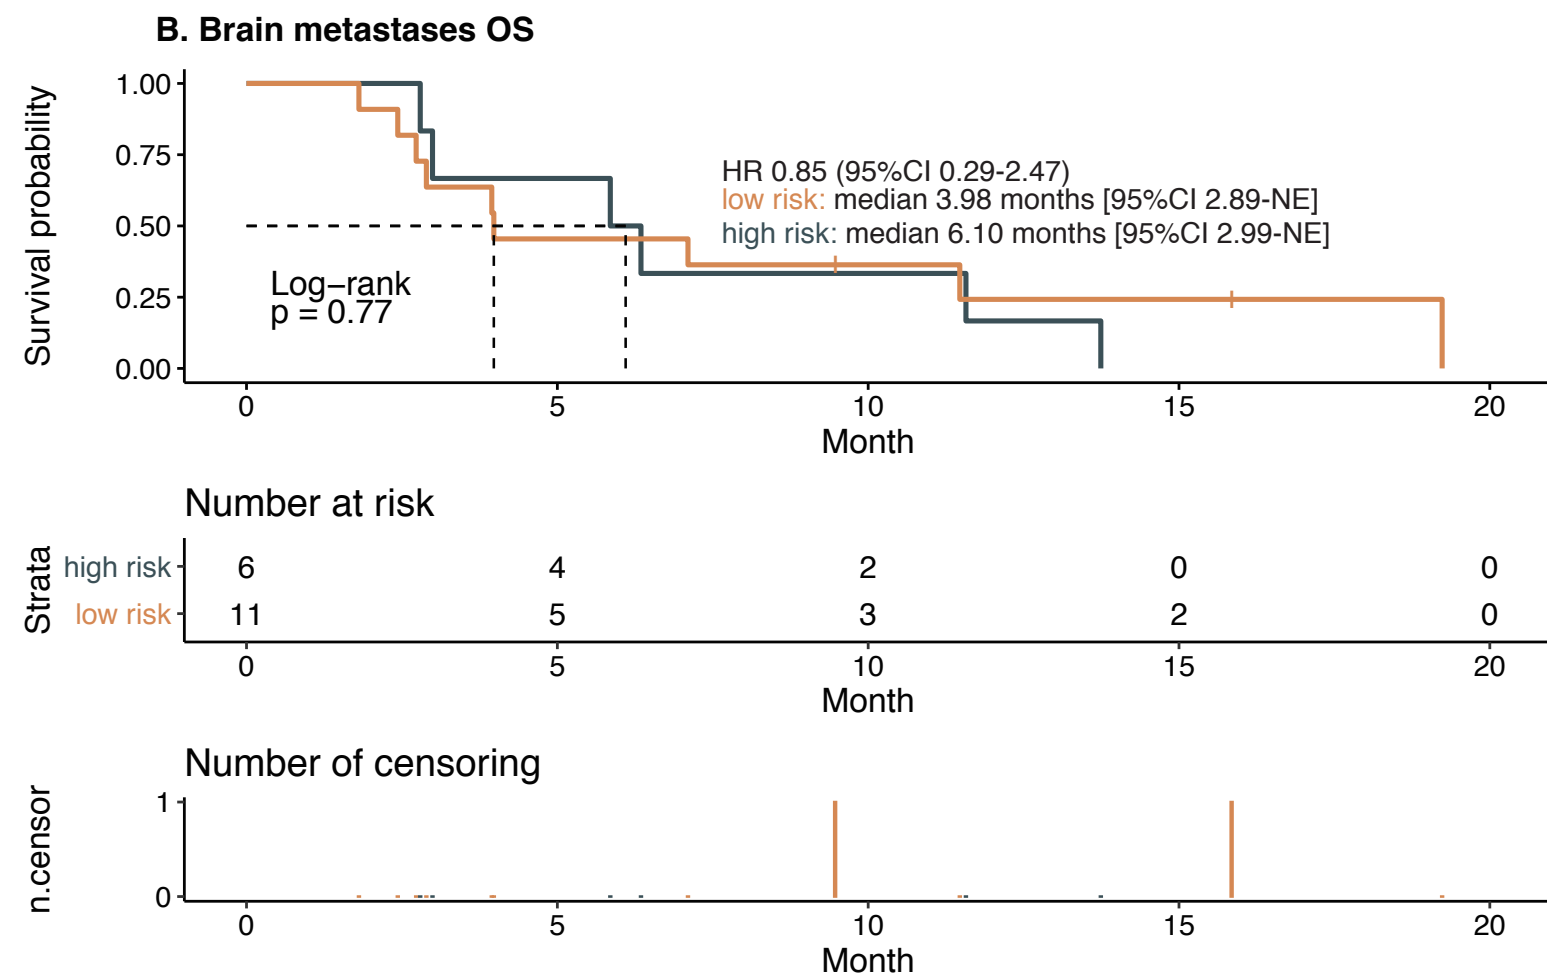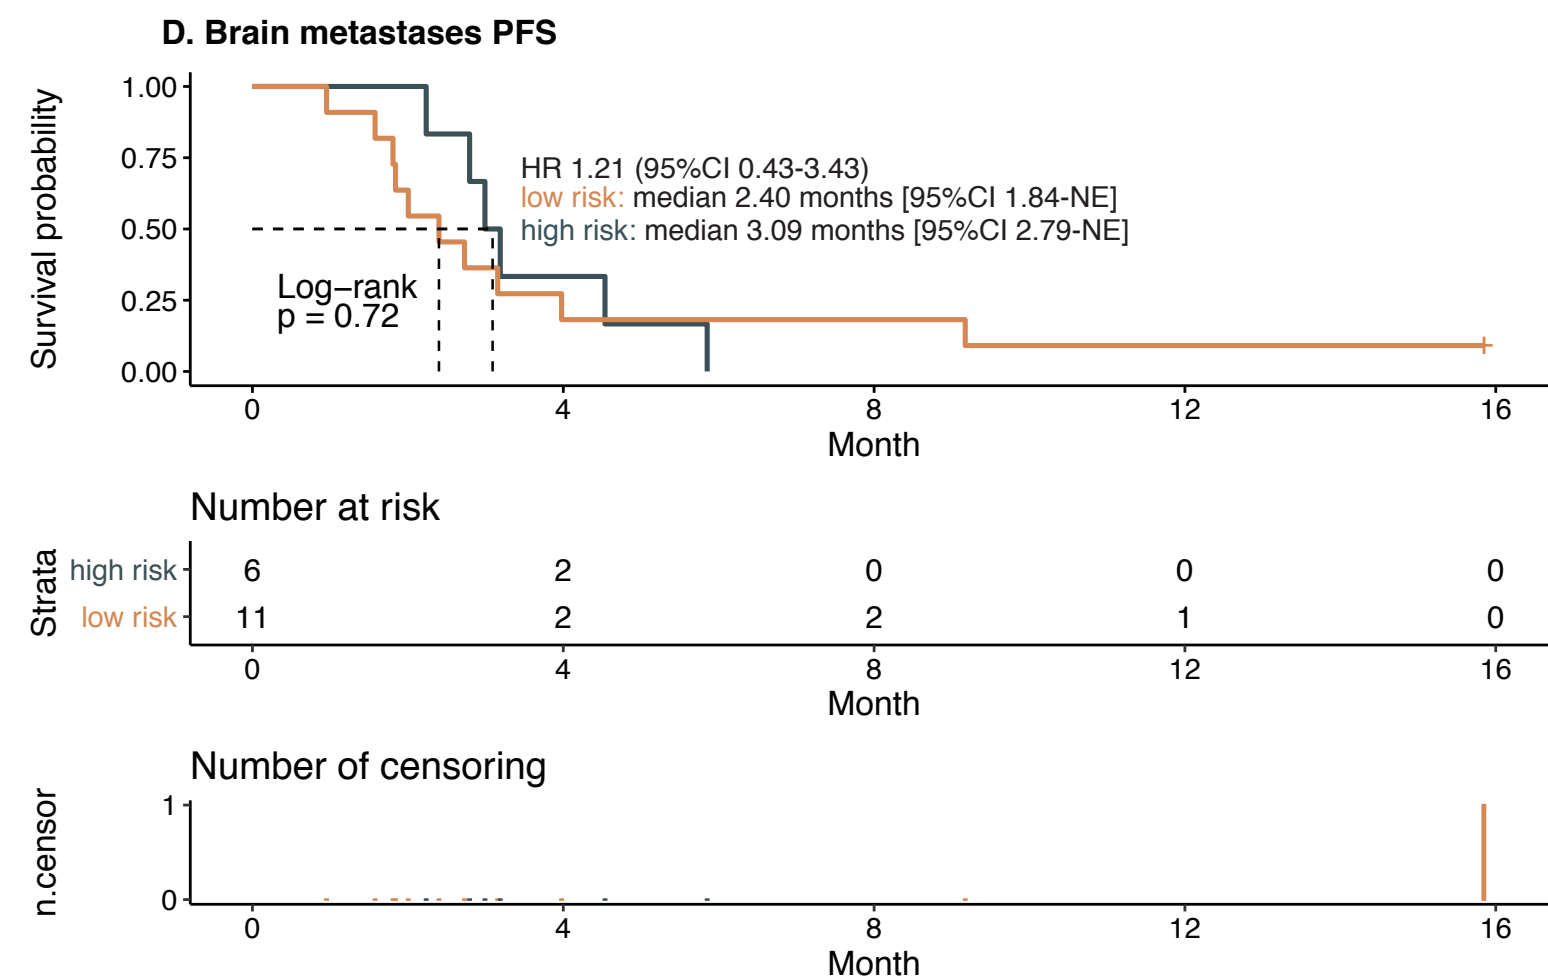

Supplement: jitc-2020-001845supp005.pdf [file jitc-2020-001845supp005.pdf]

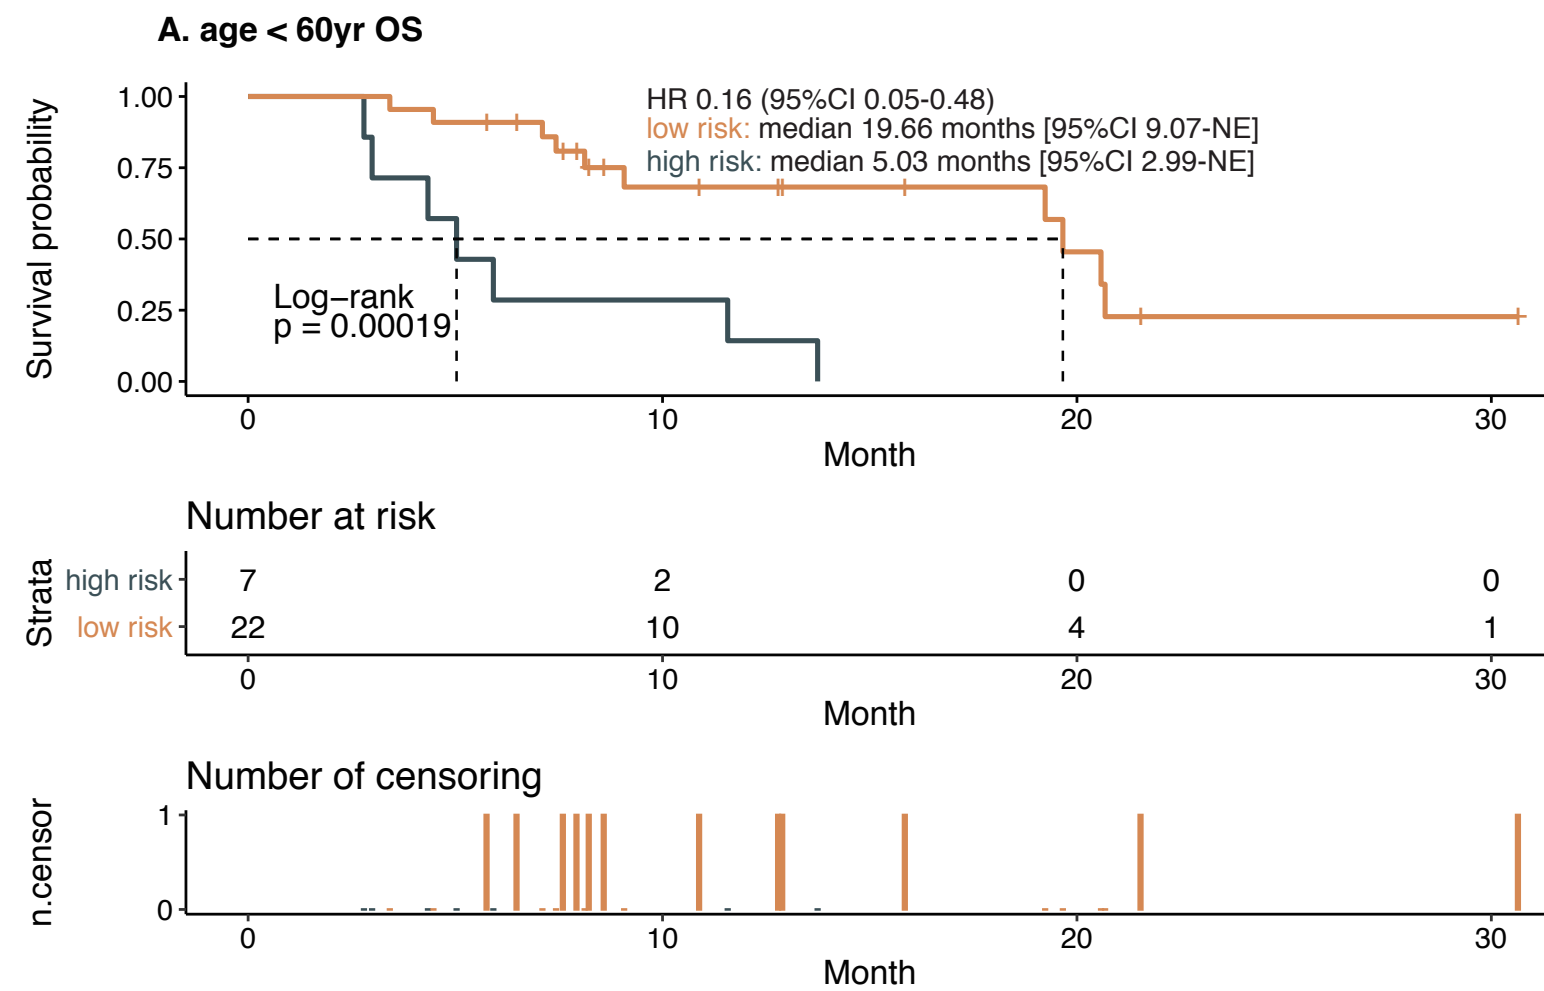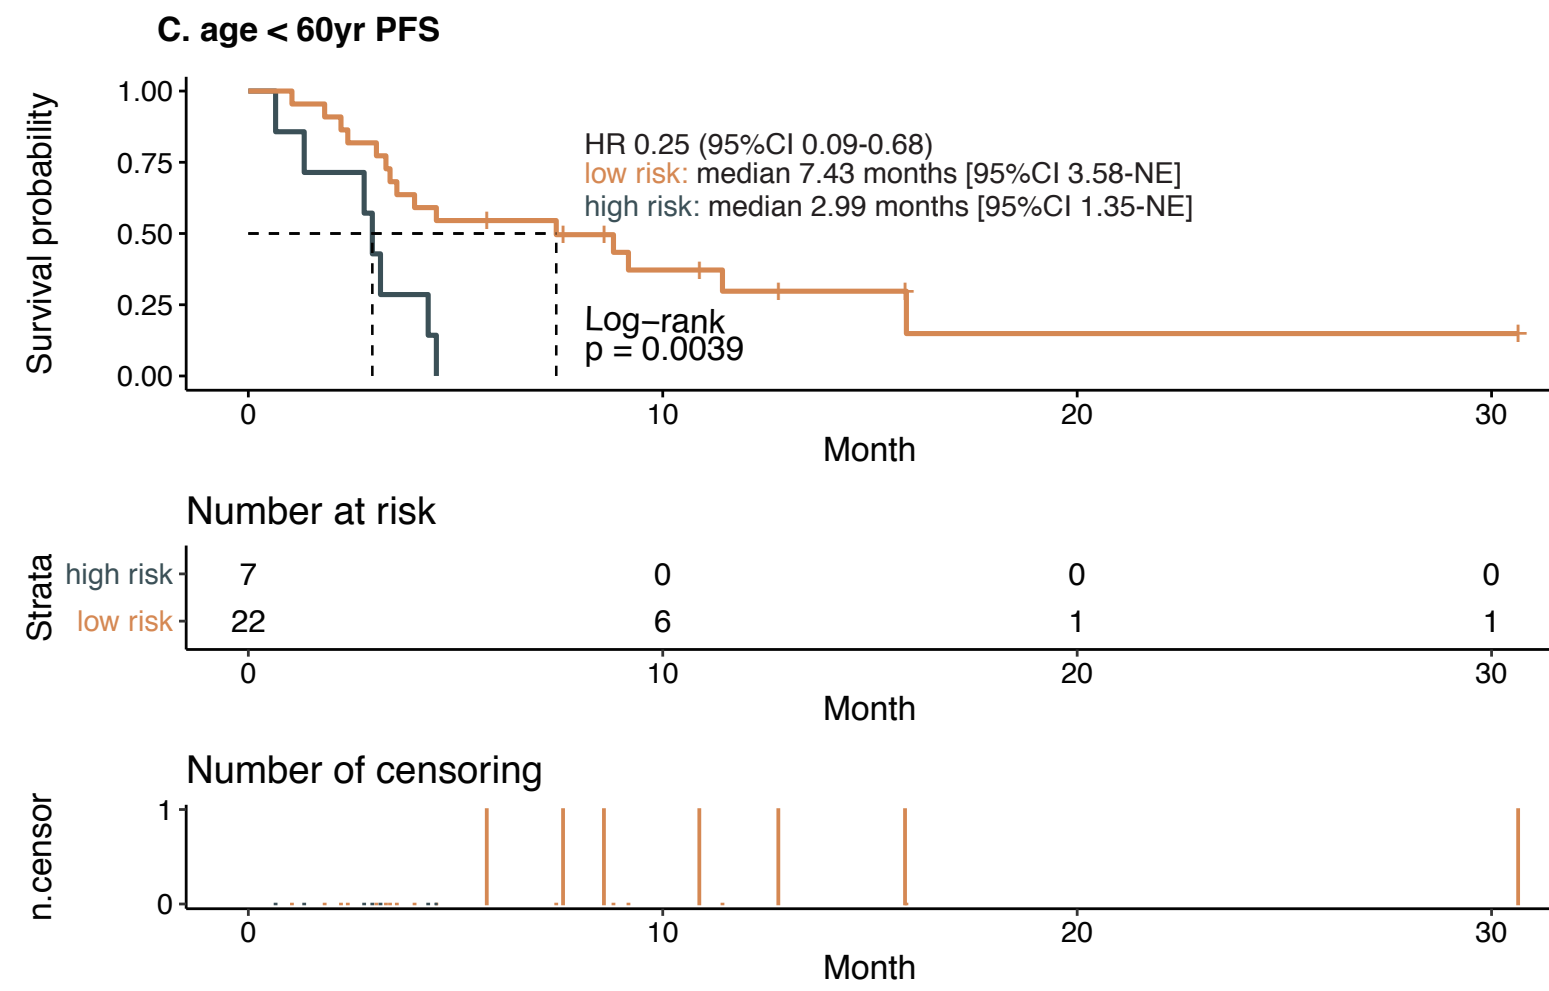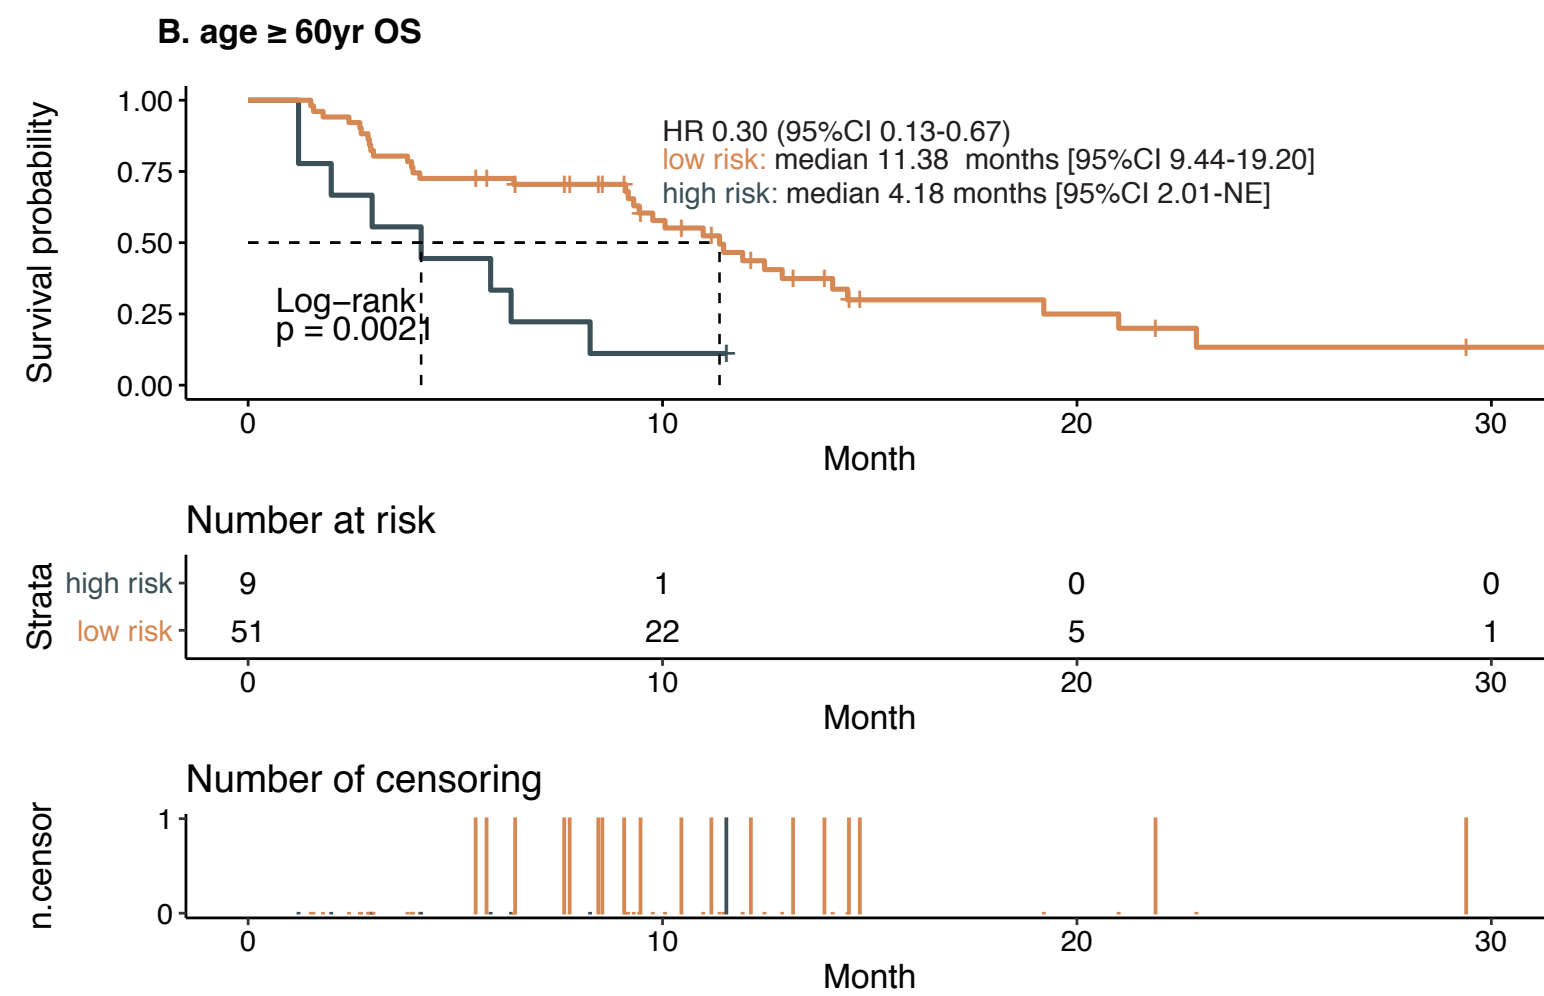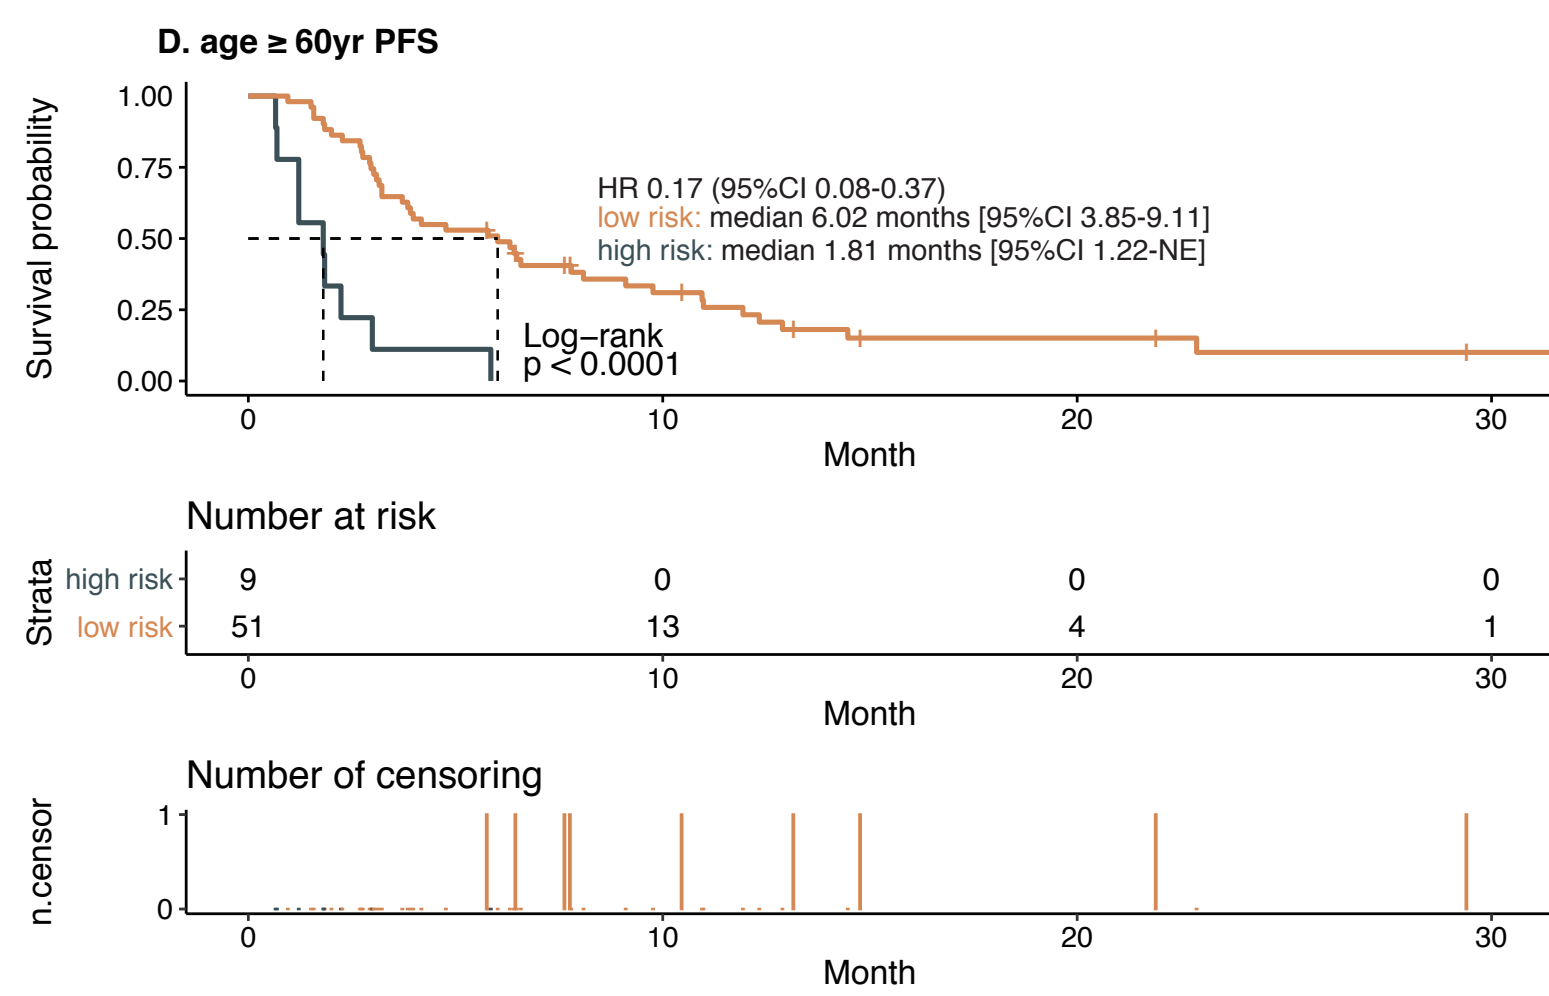

Supplement: jitc-2020-001845supp006.pdf [file jitc-2020-001845supp006.pdf]

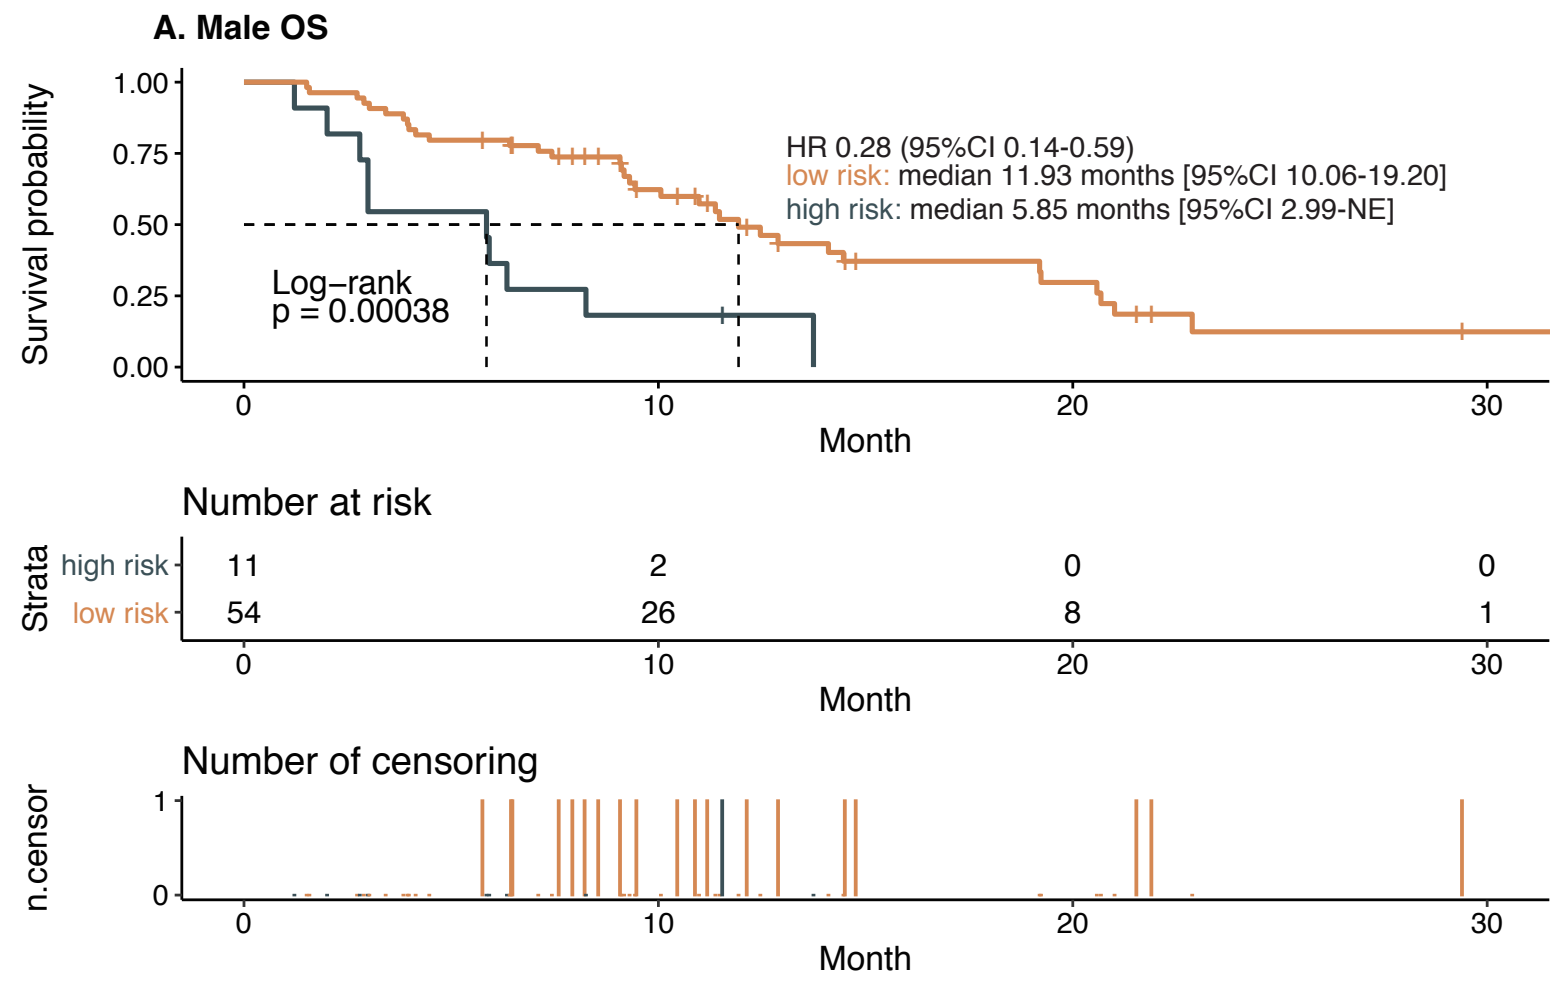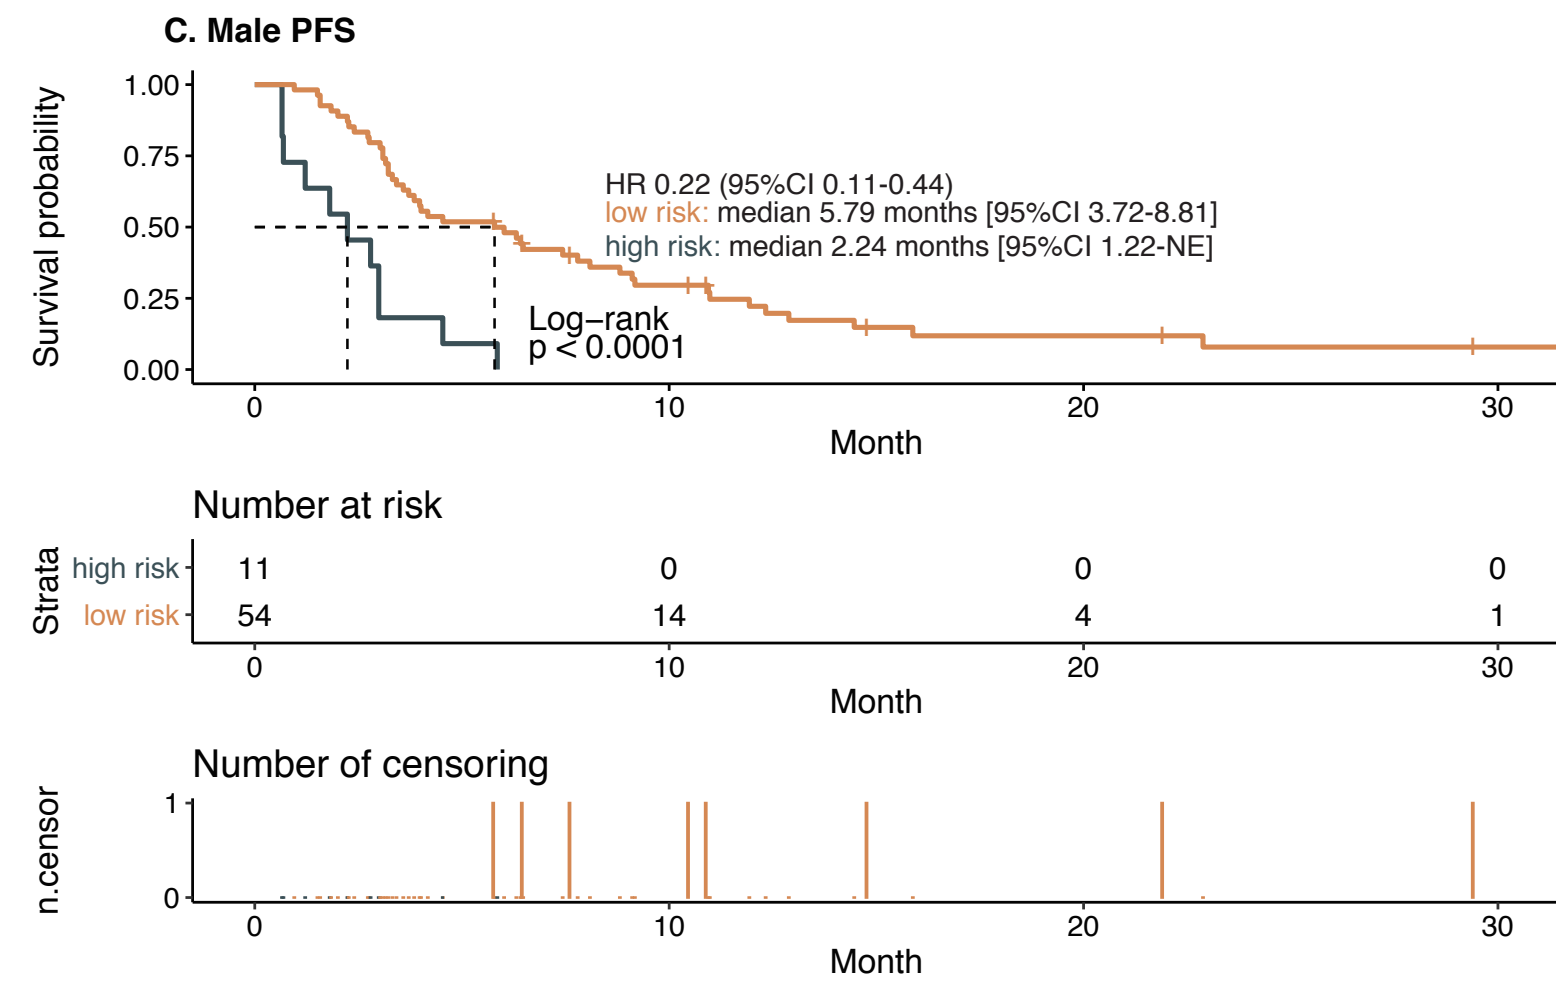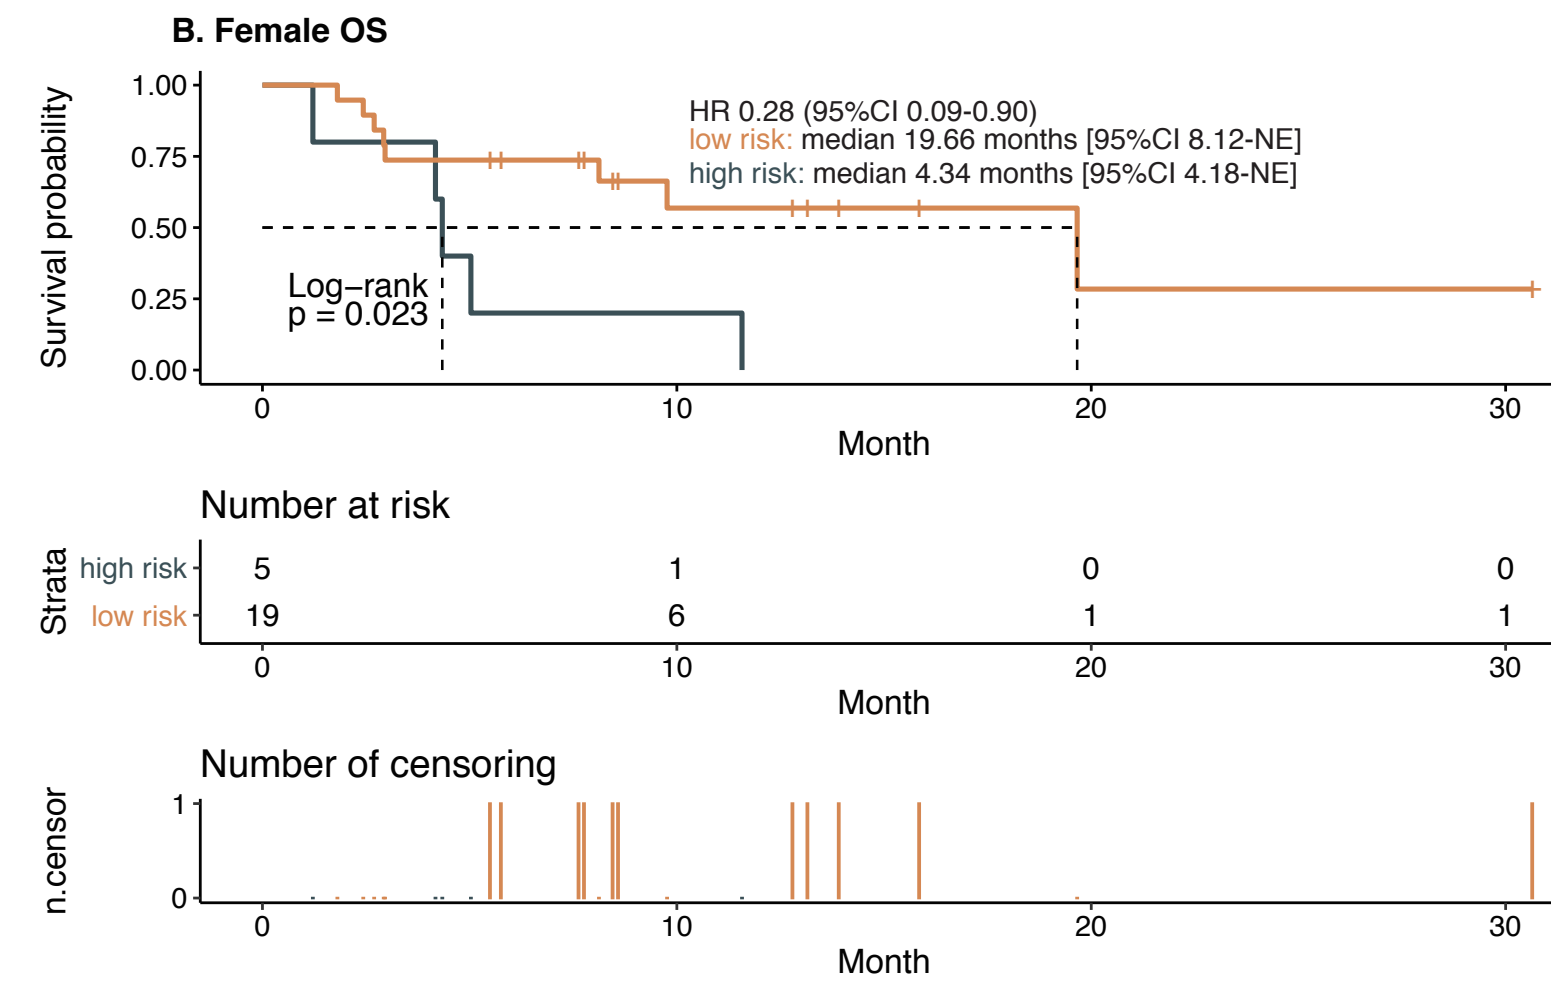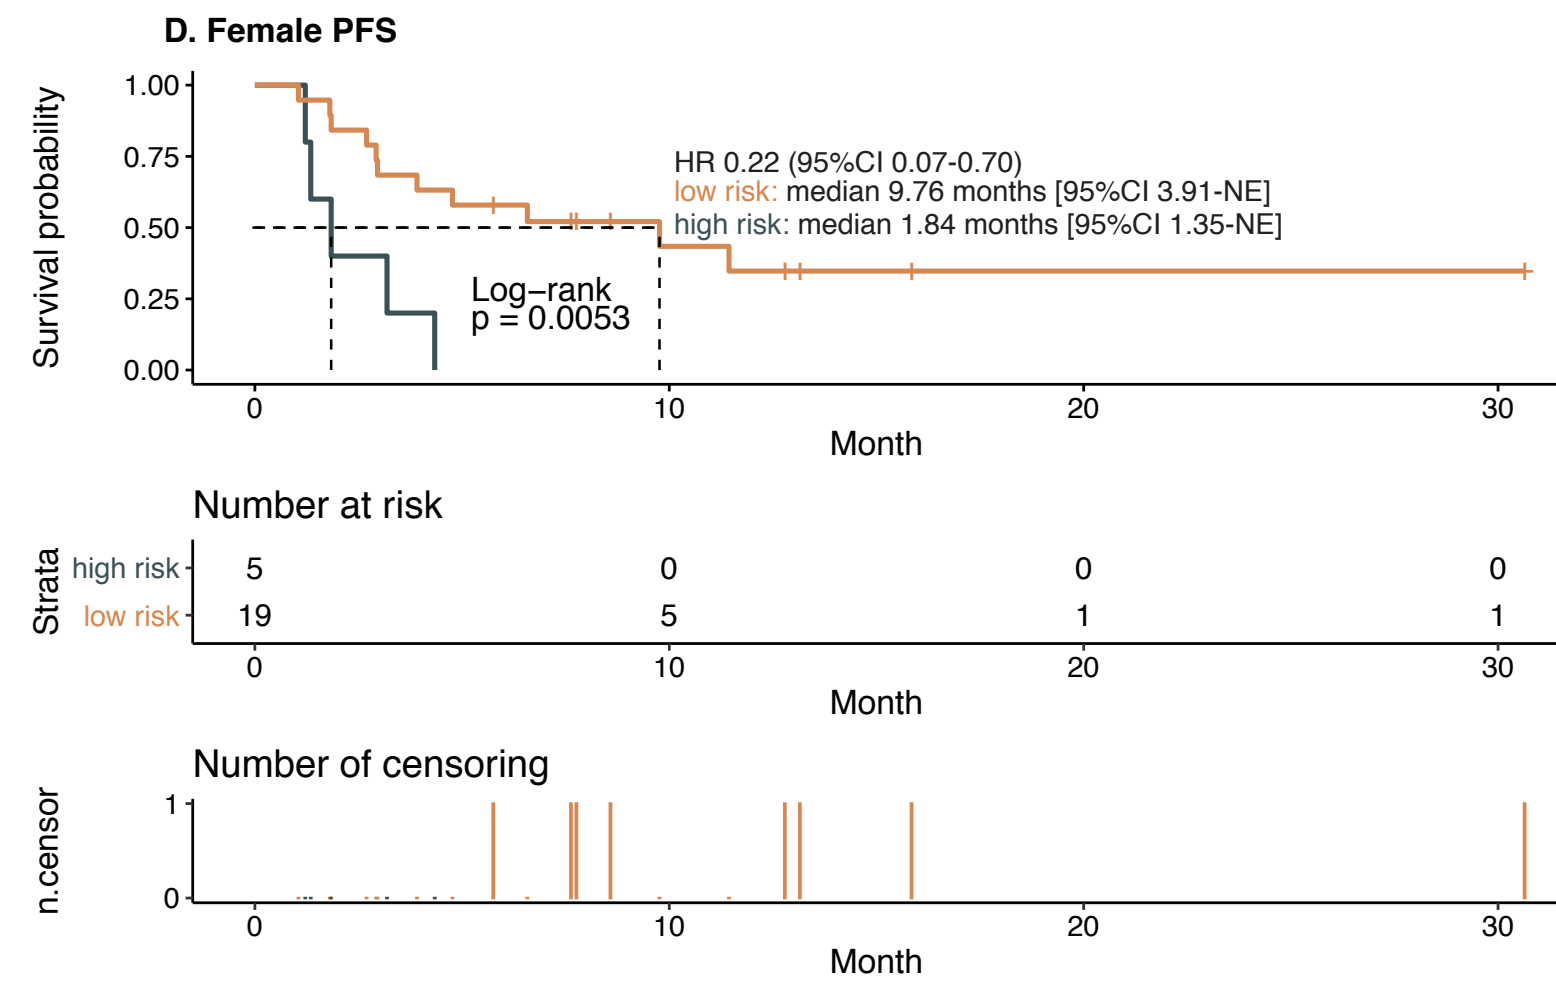

Supplement: jitc-2020-001845supp007.pdf [file jitc-2020-001845supp007.pdf]

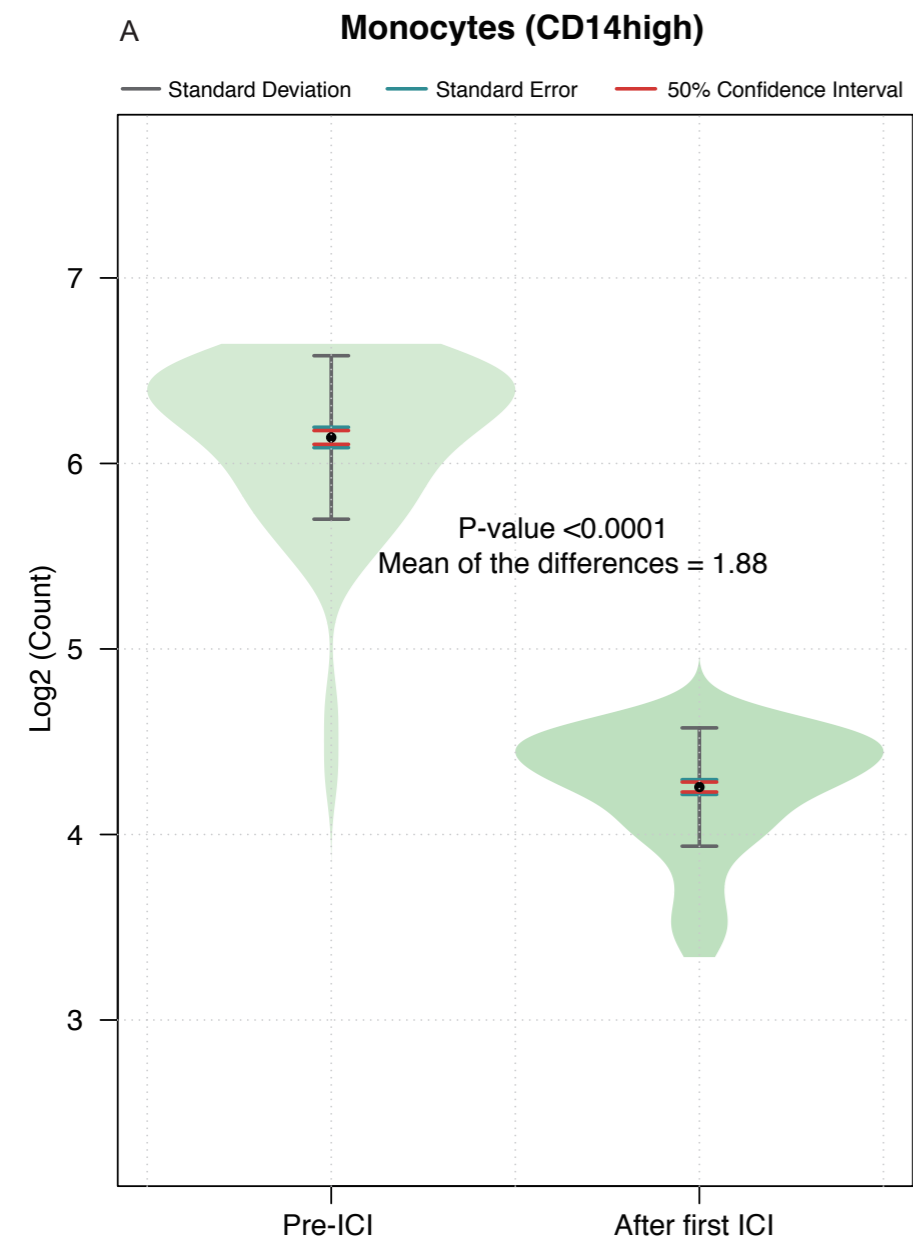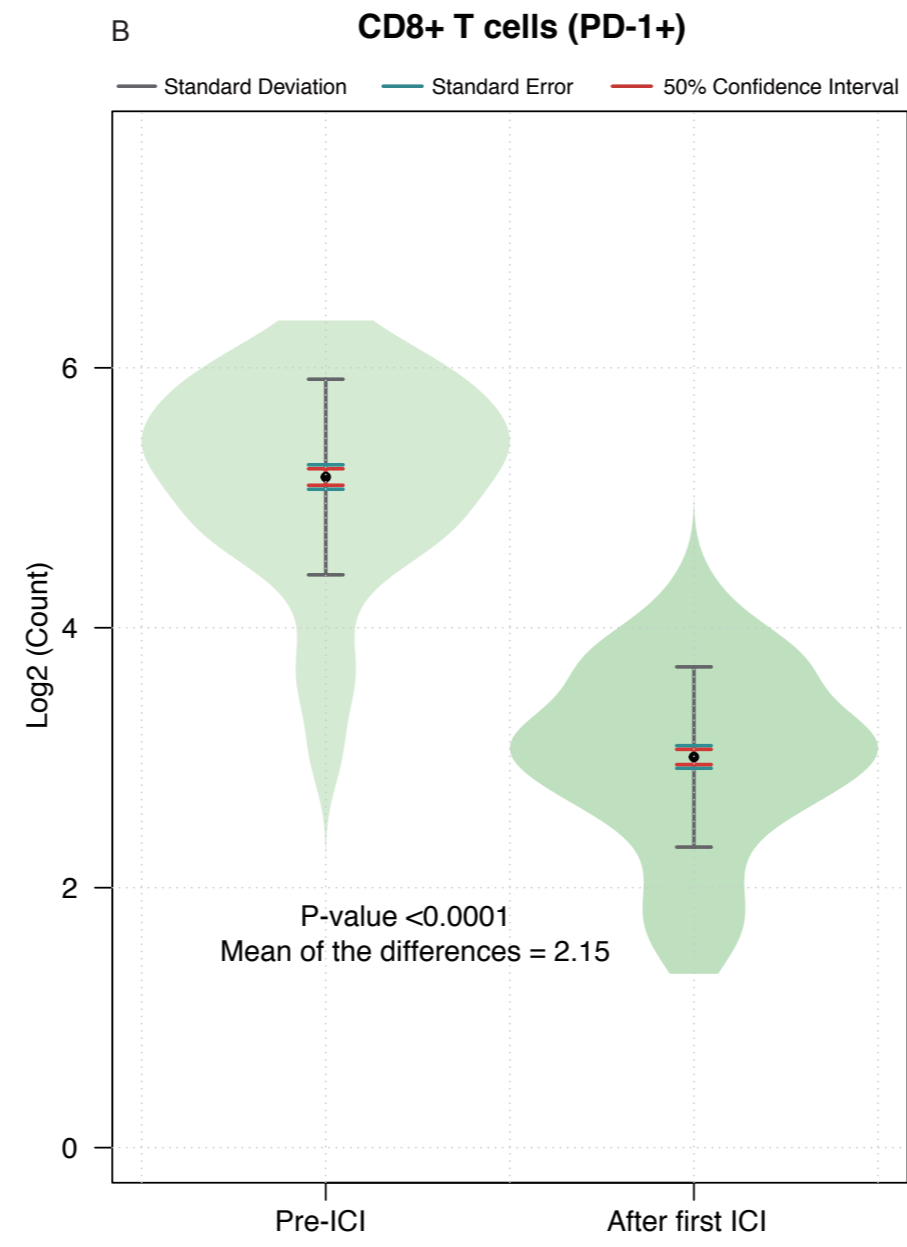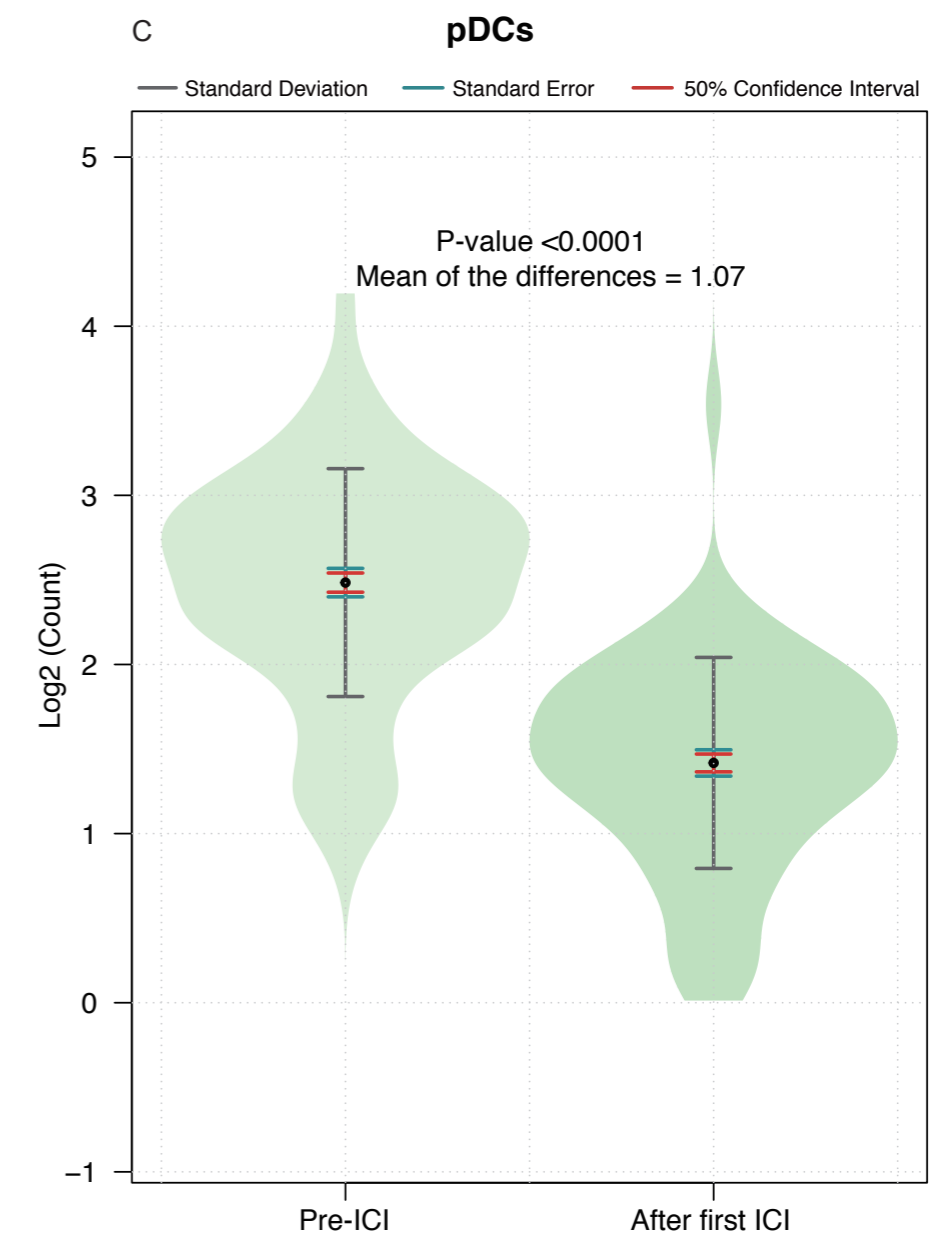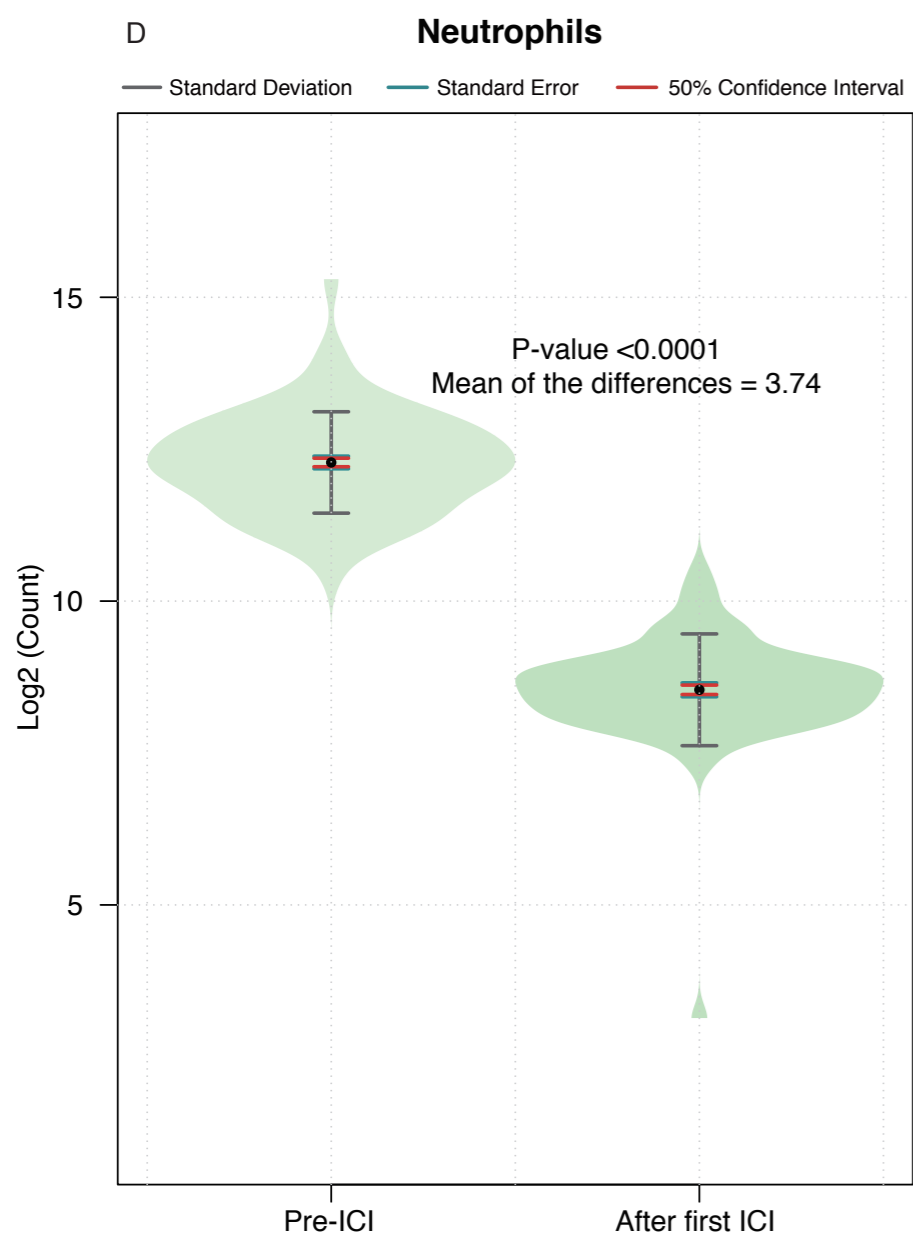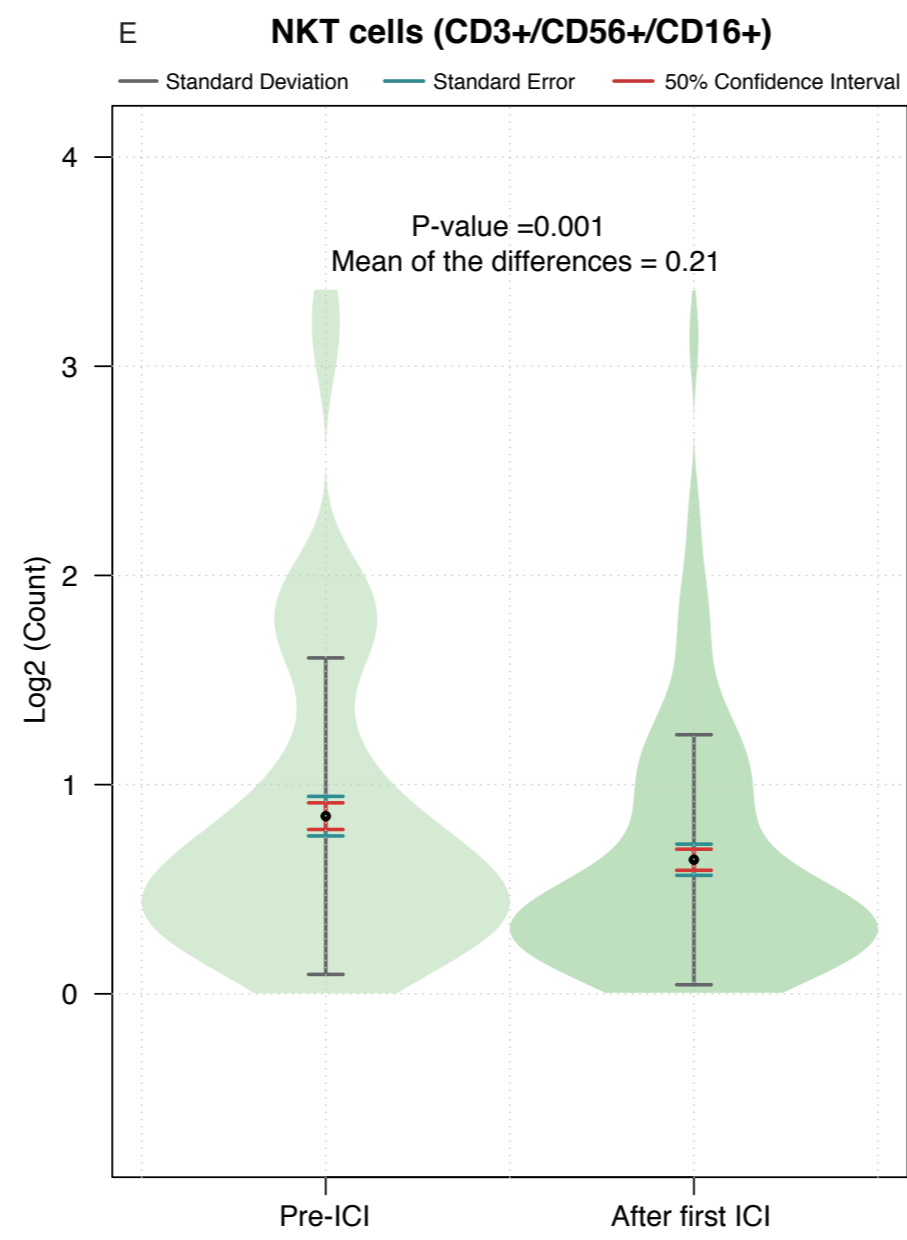

Supplement: jitc-2020-001845supp010.pdf [file jitc-2020-001845supp010.pdf]

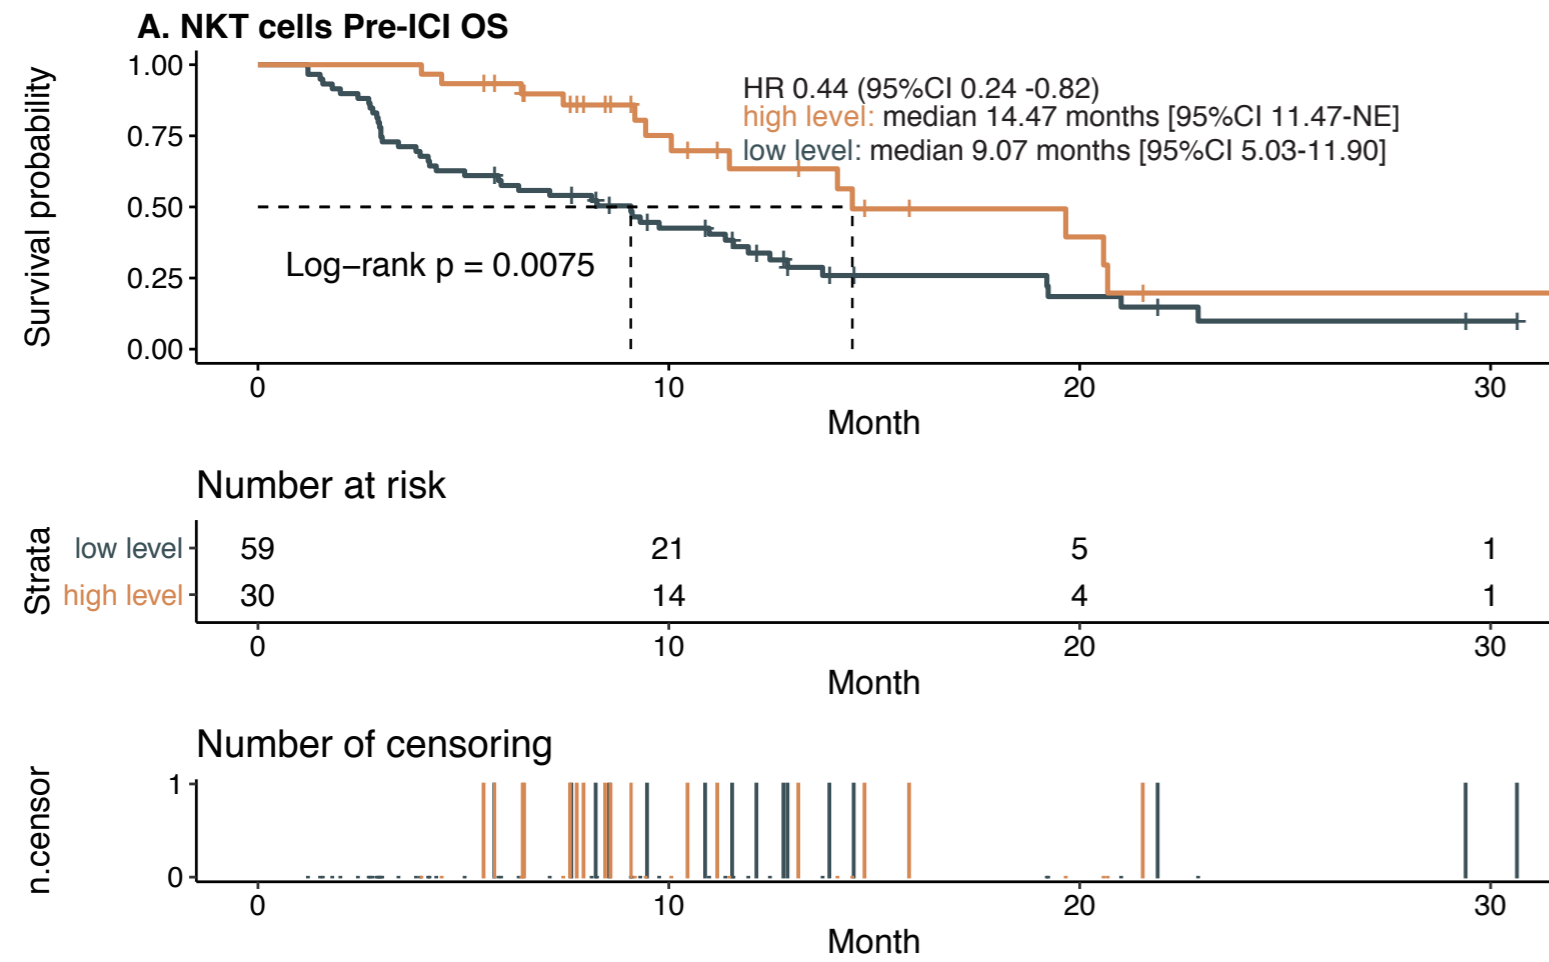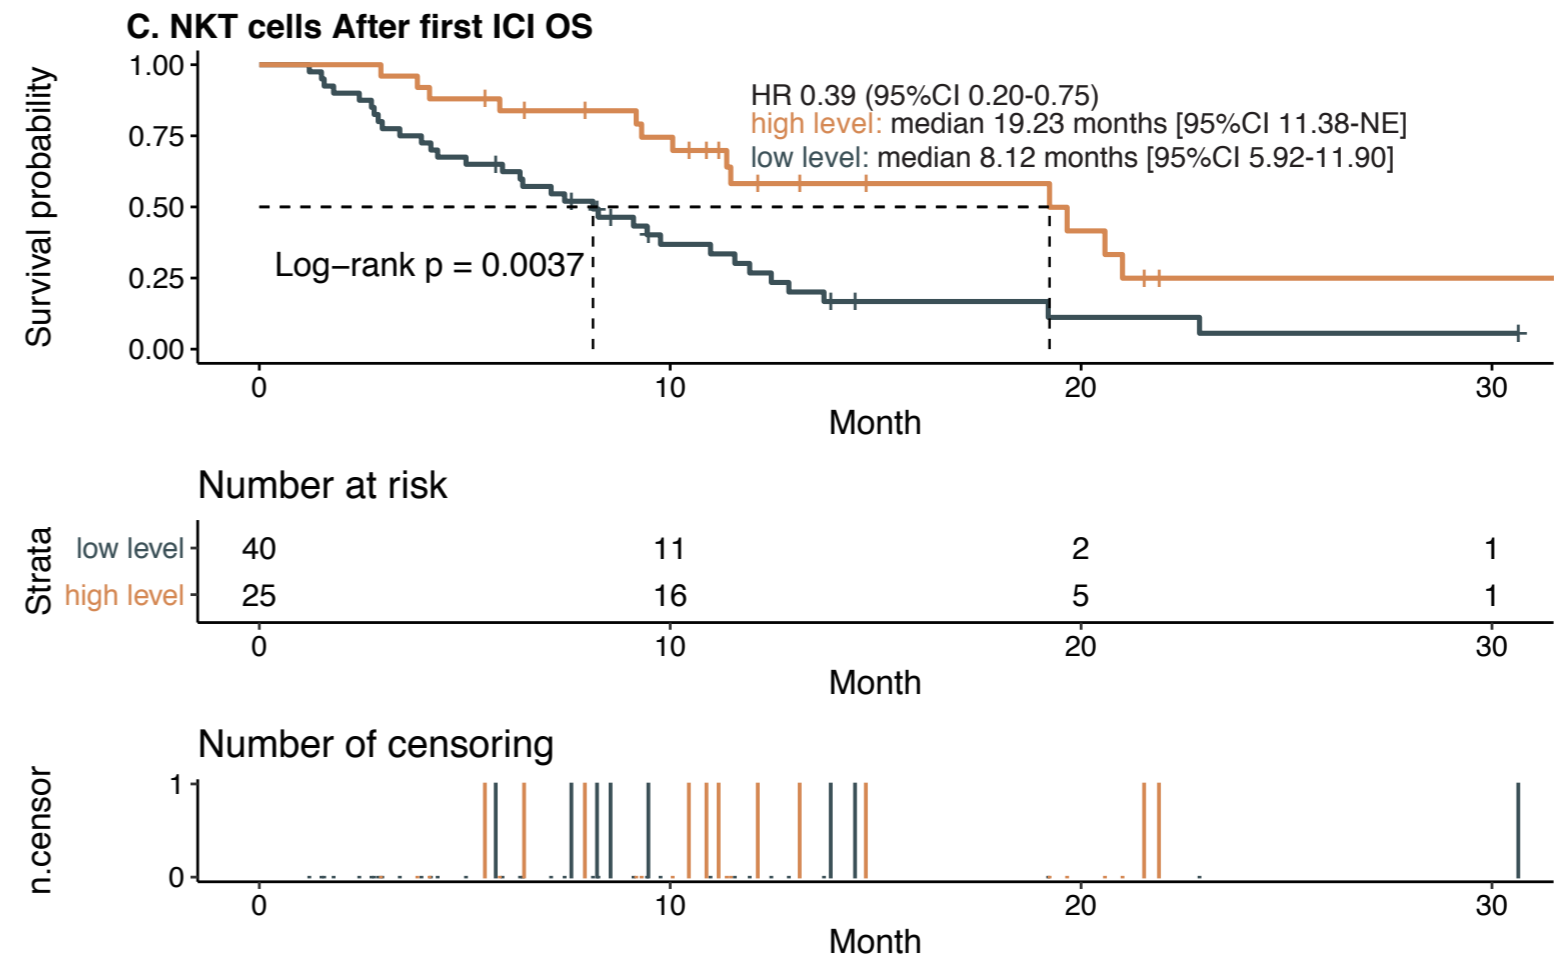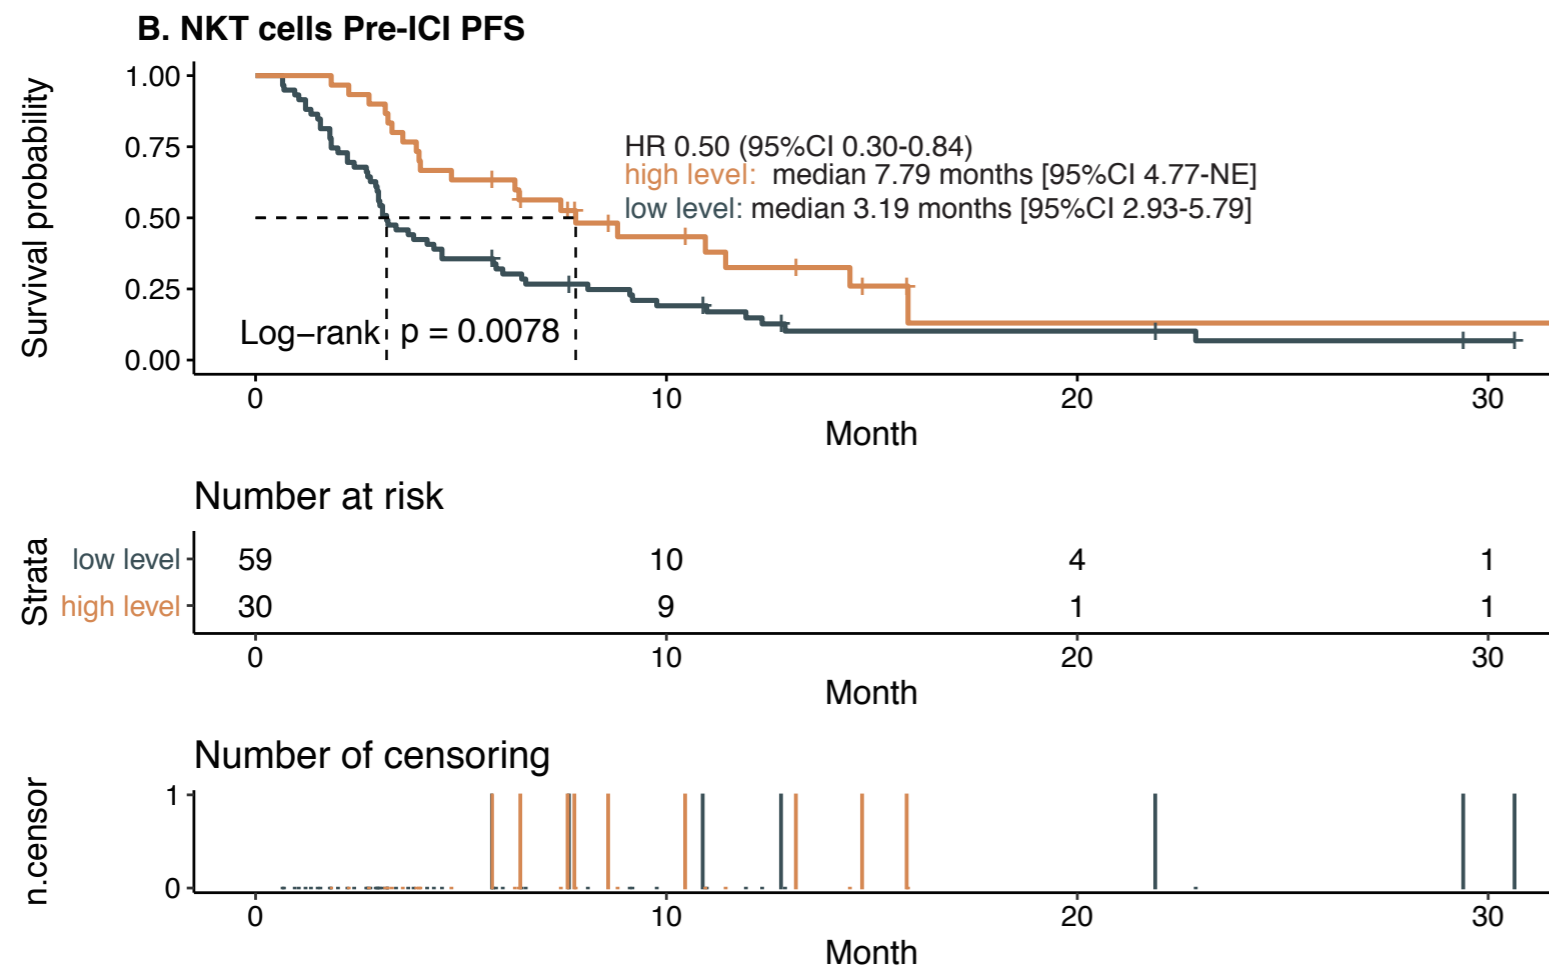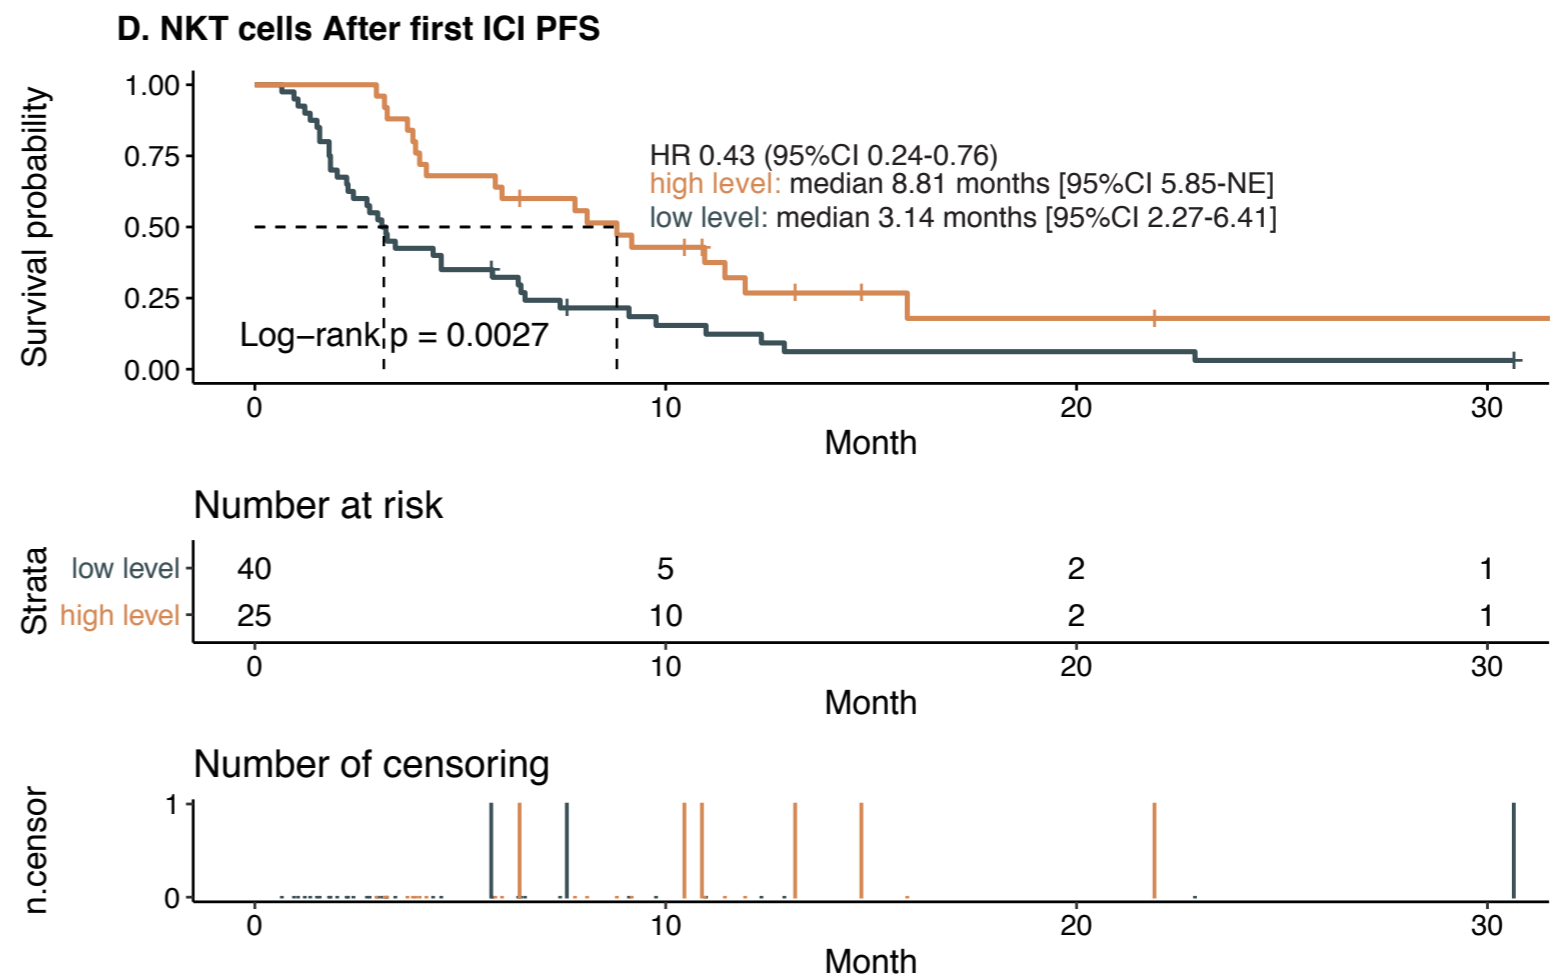

Supplement: jitc-2020-001845supp011.pdf [file jitc-2020-001845supp011.pdf]

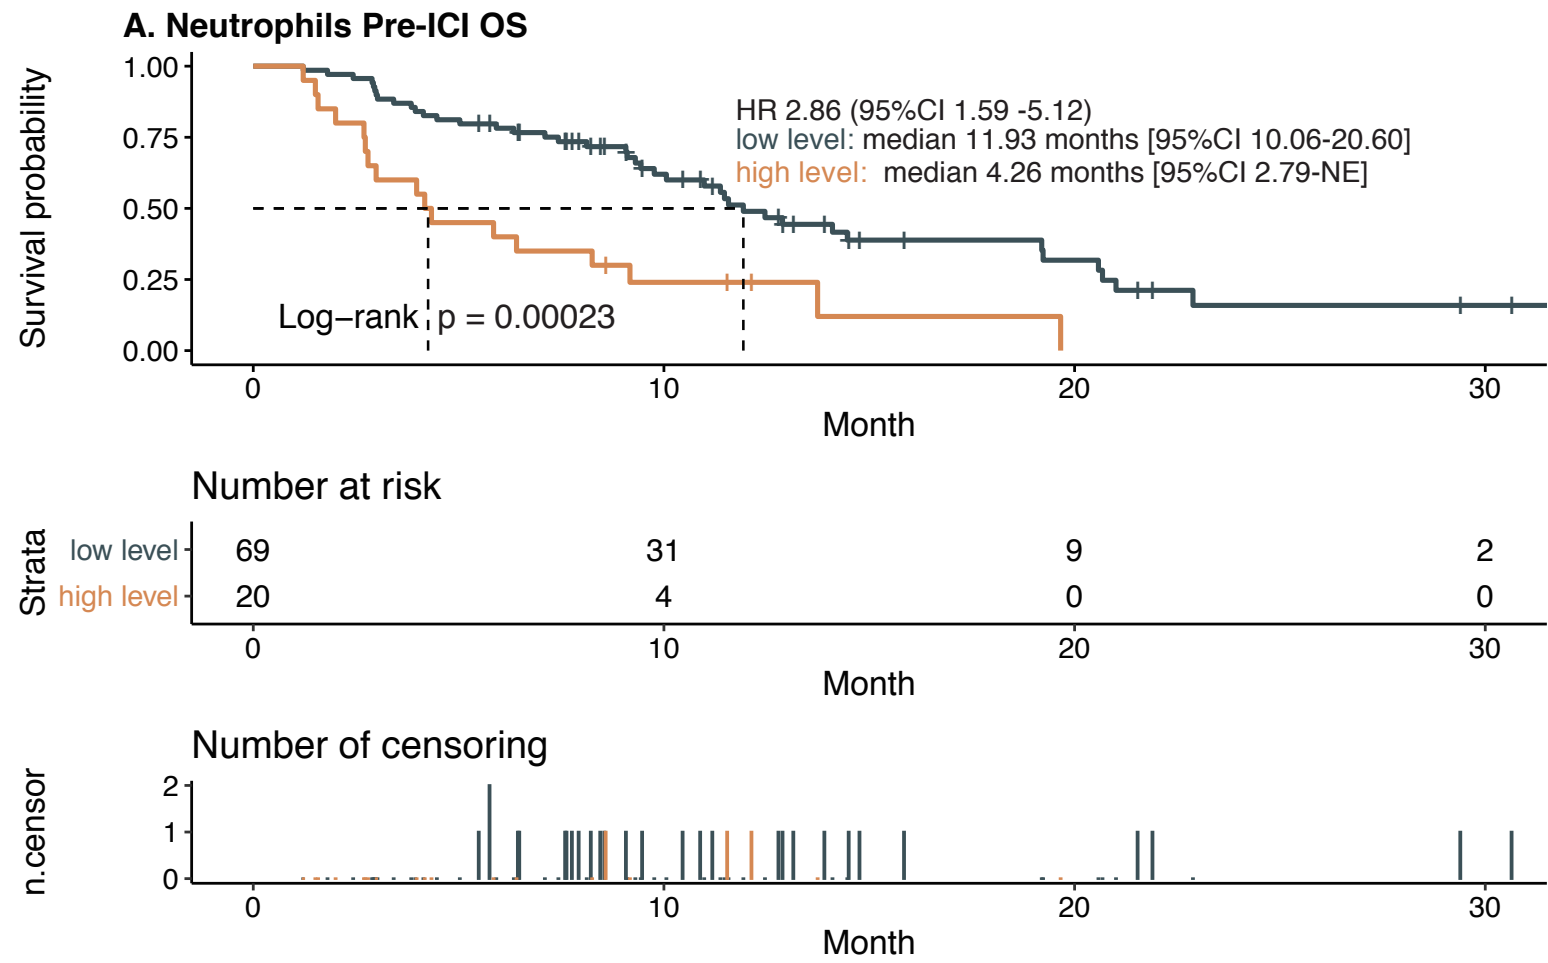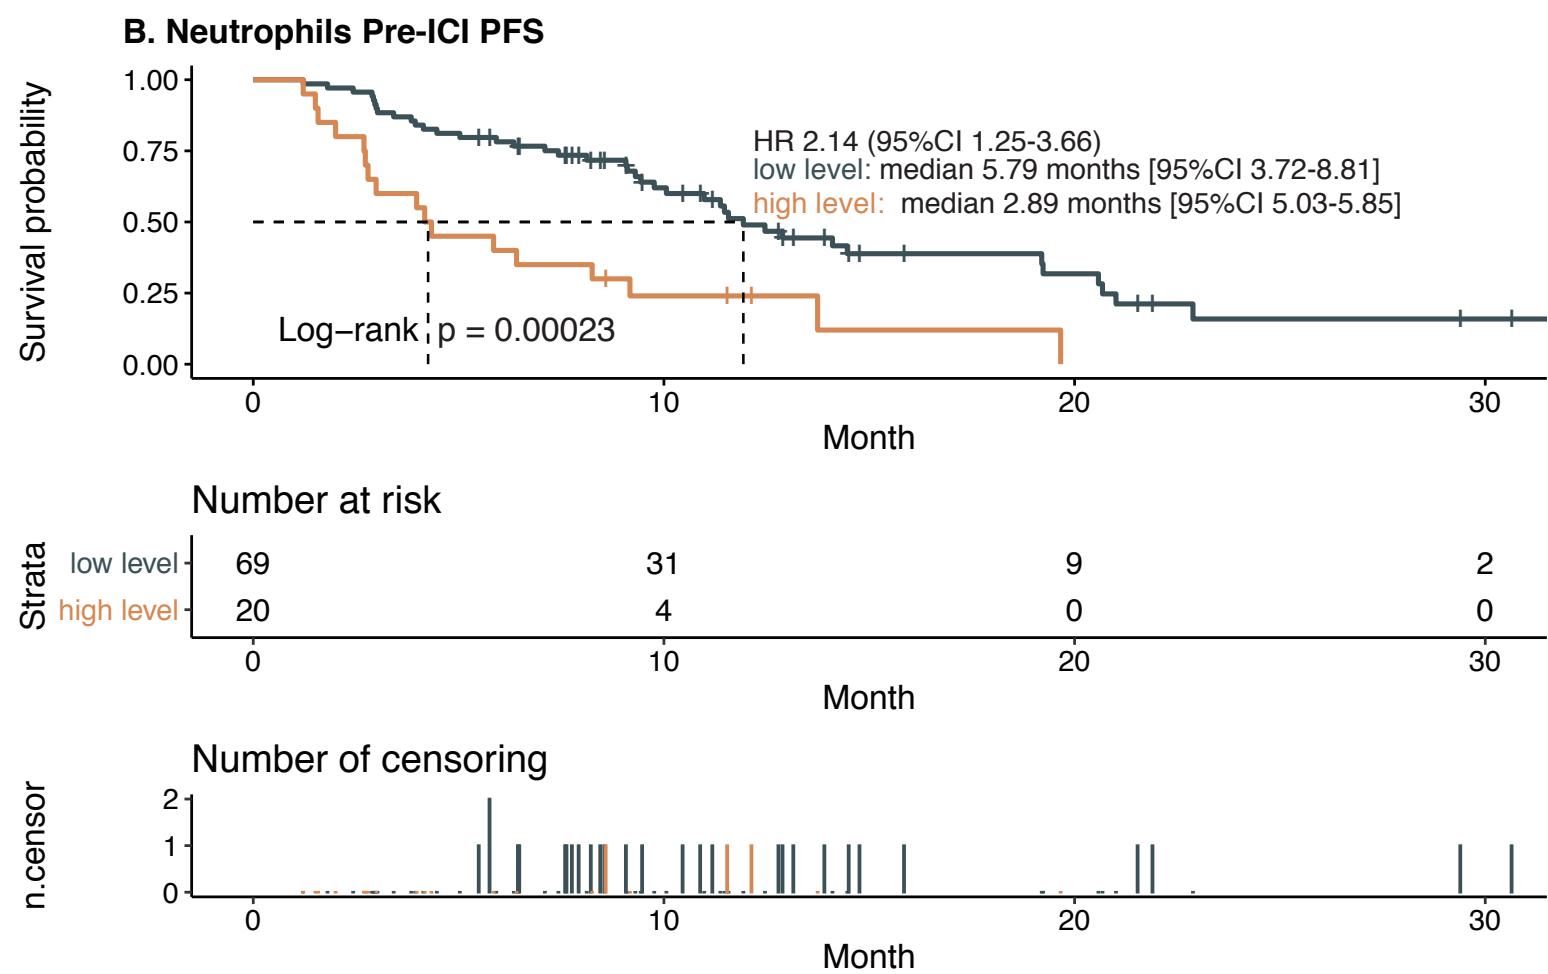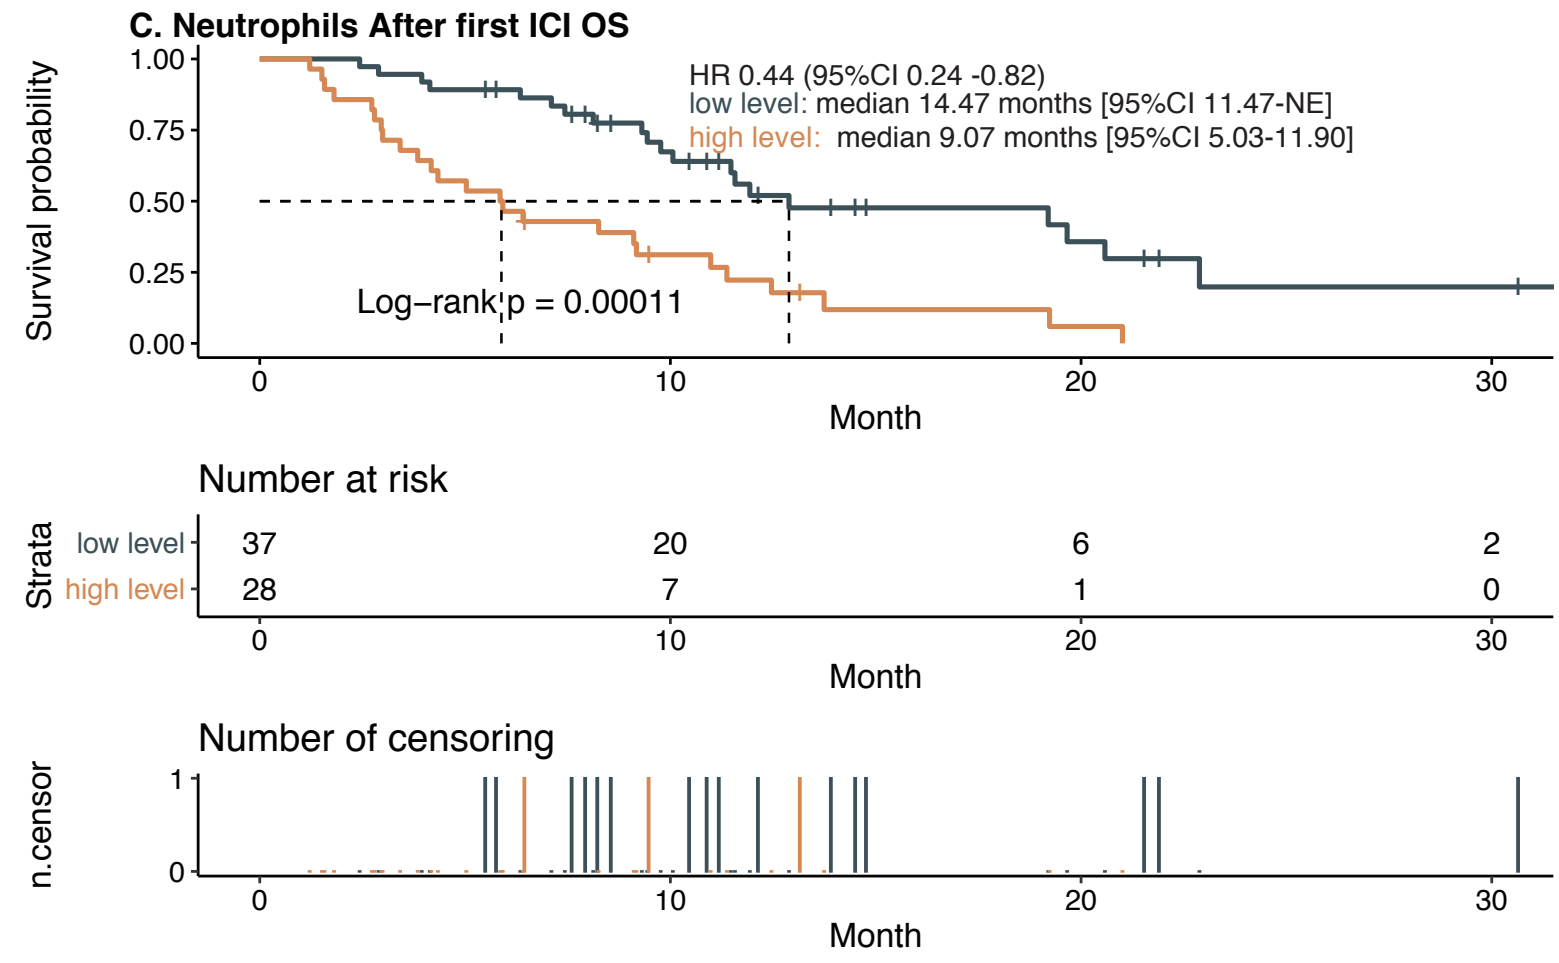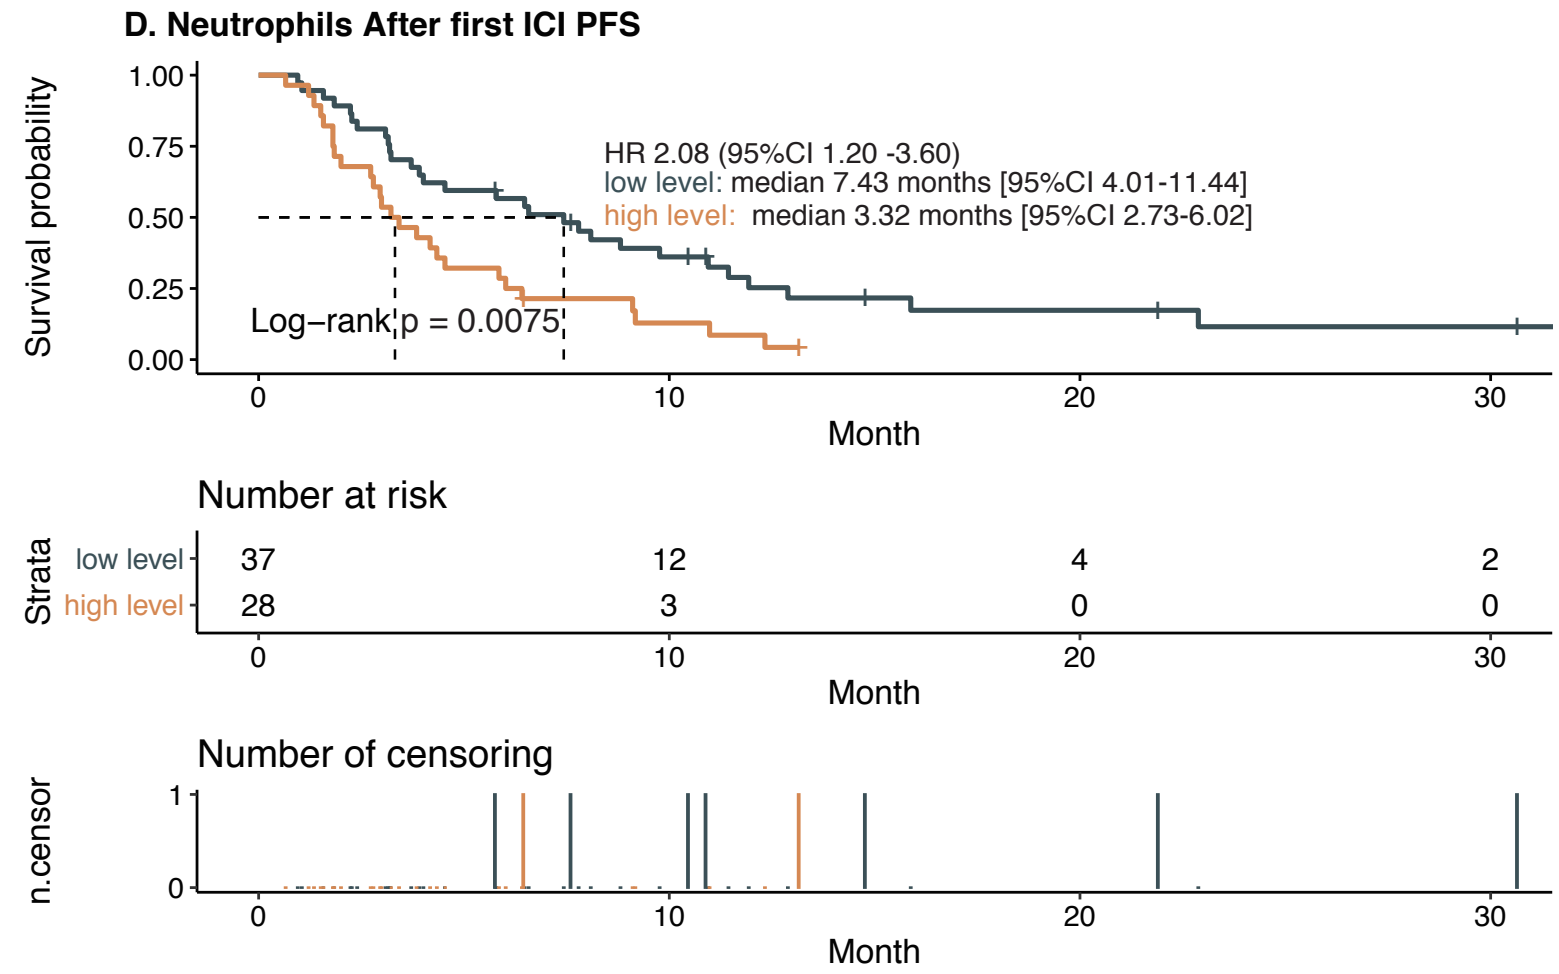

Supplement: jitc-2020-001845supp012.pdf [file jitc-2020-001845supp012.pdf]
